# Supplementary material for: Introducing AFS ([Al(SO3F)3]x) – a thermally stable, readily available, and catalytically active solid Lewis superacid
Source: Royal Society of Chemistry journal article supplement (doi:10.1039/d4sc01753f), 2024-01-01
Supplement: d4sc01753f1.pdf [file d4sc01753f1.pdf]

## Supporting Information

|      |                                                                         |    |
|------|-------------------------------------------------------------------------|----|
| 1.   | General Information .....                                               | 2  |
| 2.   | Syntheses and spectral data .....                                       | 3  |
| 2.1. | Literature procedure. <sup>[6]</sup> .....                              | 3  |
| 2.2. | Preparation of AFS (1).....                                             | 4  |
| 3.   | Testing the Lewis acidity of AFS.....                                   | 8  |
| 3.1. | AFS·CD <sub>3</sub> CN (2).....                                         | 8  |
| 3.2. | Gutmann-Beckett method. ....                                            | 10 |
| 4.   | Testing the reactivity of AFS.....                                      | 14 |
| 4.1. | Halide Abstraction Reaction with Ph <sub>3</sub> CCl.....               | 14 |
| 4.2. | Halide Abstraction Reaction with Ph <sup>F</sup> <sub>3</sub> CCl. .... | 16 |
| 4.3. | Deoxygenation of Et <sub>3</sub> PO.....                                | 19 |
| 5.   | Testing the catalytic activity.....                                     | 22 |
| 5.1. | General procedure for C–F activation reactions.....                     | 22 |
| 5.2. | NMR spectra of C–F activation reactions .....                           | 22 |
| 6.   | Quantum-chemical calculations .....                                     | 30 |
| 7.   | Literature .....                                                        | 34 |

## 1. General Information

All preparative work was carried out under an inert atmosphere using standard Schlenk techniques. Glassware was greased with Teflon III.  $\text{HSO}_3\text{F}$  was transferred using self-made PFA cannulas. All solid materials were stored and handled inside a glove box with an atmosphere of dry argon ( $\text{O}_2 < 0.5$  ppm,  $\text{H}_2\text{O} < 0.5$  ppm). All solvents were dried on  $\text{CaH}_2$  (except for acetonitrile which was dried over  $\text{P}_4\text{O}_{10}$ ) and stored on molecular sieve.  $\text{HSO}_3\text{F}$  was distilled before use and kept in a PFA bottle at  $4^\circ\text{C}$ . Trimethylaluminum in hexane (2M) was purchased from Sigma Aldrich and used as provided. Trifluoroacetic acid (TFA) and TFA anhydride were purchased from abcr and used as provided.  $\text{CPh}_3\text{Cl}$  was sublimed and dried in high vacuum.  $\text{C}(\text{C}_6\text{F}_5)_3\text{Cl}$  was prepared according to a literature procedure.<sup>[1]</sup> IR spectra were measured on a Bruker ALPHA FTIR spectrometer equipped with a diamond ATR attachment in a glove box filled with argon (resolution  $4\text{ cm}^{-1}$ ). Liquid NMR spectra were recorded on a JEOL 400 MHz ECS or ECZ spectrometer in J. Young NMR tubes. All reported chemical shifts were referenced to the  $\delta$  values given in IUPAC recommendations of 2008 using the  $^2\text{H}$  signal of the deuterated solvent as internal standard. External c Solid-state MAS (magic-angle spinning) nuclear magnetic resonance spectra were recorded on a JEOL 600 MHz ECZ S spectrometer. Thermogravimetric analyses (TGA) and differential scanning calorimetry (DSC) measurements were conducted using a NETZSCH STA 449 F3 Jupiter®. The sample was heated with a temperature gradient of  $10\text{ K min}^{-1}$ . UV-vis spectra were recorded using a Perkin Elmer Lambda 465 photometer with deuterium and tungsten lamps. A quartz cuvette with a Rydberg-Schlenk attachment was used to maintain an inert set-up.

The *Turbomole*<sup>[2]</sup> program was used to perform structural optimizations at the unrestricted Kohn-Sham DFT level, using the BP86 or B3LYP hybrid functional (with RI) in conjunction with basis sets def-SV(P) and def2-TZVPP.<sup>[3]</sup> Minima on potential energy surfaces were characterized by normal mode analysis. Thermochemical data is provided without counterpoise correction but includes zero-point energy correction as obtained from harmonic vibrational frequencies. All stationary points of the potential energy surface (PES) were characterized by analytic evaluation of second derivatives. Optimized structures correspond to minima on their respective potential energy surfaces. Subsequent single point calculations were performed with the *ORCA*<sup>[4]</sup> program package. For FIA calculations all compounds were computed in the gas phase, for oligomerization reactions and TD-DFT calculations the COSMO and the CPCM solvent model were used.<sup>[5]</sup>

## 2. Syntheses and spectral data

### 2.1. Literature procedure.<sup>16</sup>

**Synthesis of  $\text{Al}(\text{O}_2\text{CCF}_3)_3$ .** Freshly prepared aluminum amalgam (Al foil, 2% aqueous  $\text{HgCl}_2$ ) was dissolved in aqueous TFA (50%). The clear solution was separated from liquid Hg and evaporated to dryness. A glassy substance was obtained, that was washed (2x) with TFA anhydride and dried in high vacuum.  $\text{Al}(\text{O}_2\text{CCF}_3)_3$  was obtained as a colorless powder (2.2 g from 0.22 g Al).

**IR (ATR, 25°C)**  $\tilde{\nu} = 3670$  (w), 1672 (s, br), 1609 (vw, sh), 1507 (m), 1208 (vs), 1162 (vs), 1048 (s), 883 (w), 871 (w), 801 (m), 735 (m), 701 (w), 640 (m, br), 560 (s, br), 526 (m, sh), 453 (m), 432 (s)  $\text{cm}^{-1}$ .

**Synthesis of “ $\text{Al}(\text{SO}_3\text{F})_3$ ”.** Freshly distilled  $\text{HSO}_3\text{F}$  (0.165 g, 1.65 mmol, 3.0 eq) was added to a solution of  $\text{Al}(\text{O}_2\text{CCF}_3)_3$  (0.2 g, 0.55 mmol) in  $\text{SO}_2\text{Cl}_2$  (5 mL) at  $-140$  °C. The reaction mixture was slowly warmed to  $10$  °C and stirred for 6 hours. It was filtrated and washed (2x) with  $\text{SO}_2\text{Cl}_2$  and  $\text{CCl}_4$  (1x) and dried overnight at high vacuum. A colorless powder was obtained.

In the “optimized” version of this procedure, 7 eq.  $\text{HSO}_3\text{F}$  were added to a solution of  $\text{Al}(\text{O}_2\text{CCF}_3)_3$  in  $\text{SO}_2\text{Cl}_2$ .

**IR (ATR, 25°C)**  $\tilde{\nu} = 3673$  (w), 2947 (vb, w), 2513 (b, sh), 1684 (m), 1509 (w), 1403 (sh), 1330 (sh), 1213 (s), 1167 (vs), 1094 (vs), 1053 (sh), 990 (sh), 954 (m), 856 (m), 801 (m), 735 (m), 645 (sh), 560 (vs)  $\text{cm}^{-1}$ .

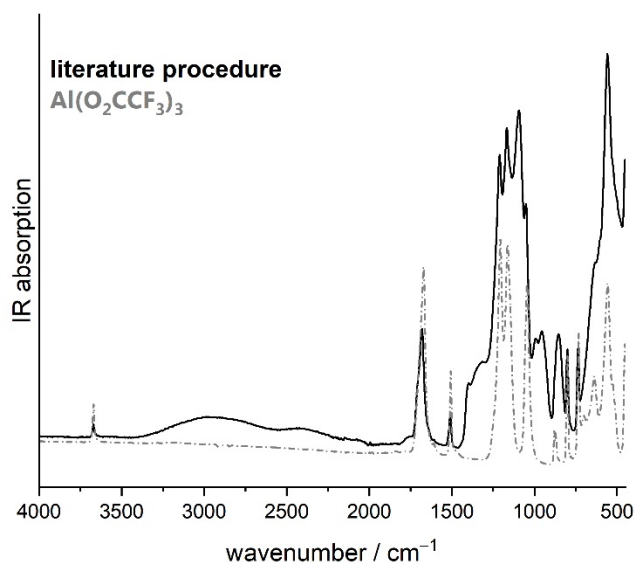

Figure S 1. IR (ATR, 25 °C) of the reaction product of the literature procedure. In grey, the IR spectrum of the starting material,  $\text{Al}(\text{O}_2\text{CCF}_3)_3$ , is shown. The reaction product does still contain starting material; indicating an incomplete conversion.

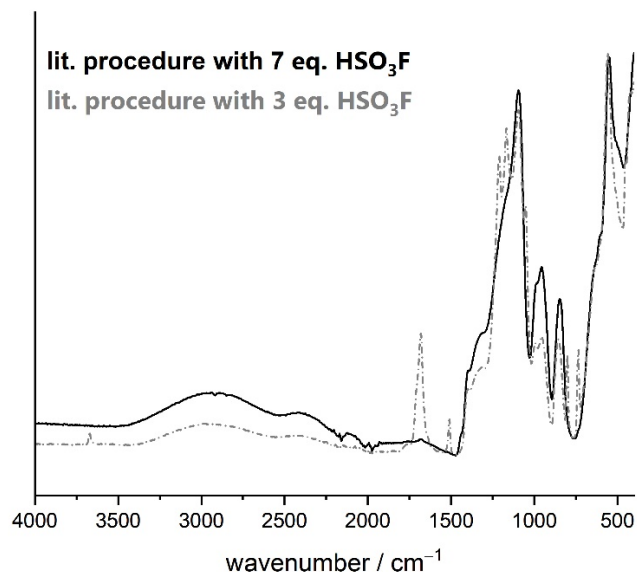

Figure S 2. IR (ATR, 25 °C) of the reaction product of the “optimized” literature procedure using a large excess of  $\text{HSO}_3\text{F}$ . No bands corresponding to the starting material  $\text{Al}(\text{O}_2\text{CCF}_3)_3$  are visible anymore, yet the bands corresponding to fluorosulfuric acid are still present even after a long drying period.

## 2.2. Preparation of AFS (1)

A cooled solution of fluorosulfuric acid (450 mg, 4.5 mmol, 3.0 eq) in 1,2,3-trifluorobenzene was transferred onto a frozen solution of  $\text{AlMe}_3$  (2M, in hexane, 108 mg, 1.5 mmol) in 1,2,3-trifluorobenzene at  $-80\text{ }^\circ\text{C}$ . The mixture was first warmed to  $-30\text{ }^\circ\text{C}$  and vigorously stirred until the gas evolution ceased. Afterward, the reaction mixture was brought to room temperature. A colorless solid precipitated. The solution was stirred for an additional hour at room temperature. Then, all volatiles were pumped off and the obtained colorless powder was dried overnight under high vacuum at  $40\text{ }^\circ\text{C}$  (465 mg, 1.44 mmol, 96%).

**IR (ATR, 25 °C):**  $\tilde{\nu} = 1399$  (s), 1380 (vs), 1105 (s), 862 (s), 562 (vs), 460 (m), 363 (s)  $\text{cm}^{-1}$ .  **$^{27}\text{Al}$  MAS**

**NMR (21 kHz, 25 °C):**  $\delta = -17$  (s),  $-23$  (s) ppm.  **$^{19}\text{F}$  MAS NMR (21 kHz, 25 °C):**  $\delta = 36$  (s) ppm.

| solvent                                                      | solubility                                                                                                                                                                                                                             |
|--------------------------------------------------------------|----------------------------------------------------------------------------------------------------------------------------------------------------------------------------------------------------------------------------------------|
| MeCN, EtCN                                                   | sparingly soluble, but formation of various complexes, such as $[\text{Al}(\text{SO}_3\text{F})_4(\text{MeCN})_2]^-$ and $[\text{Al}(\text{SO}_3\text{F})_2(\text{MeCN})_4]^+$ due to autoionization as well as higher charged species |
| $\text{Et}_2\text{O}$ , DCM, fluorobenzene, trifluorobenzene | no solubility                                                                                                                                                                                                                          |
| toluene, pyridine                                            | soluble, but aromatic substrates undergo electrophilic aromatic substitution                                                                                                                                                           |

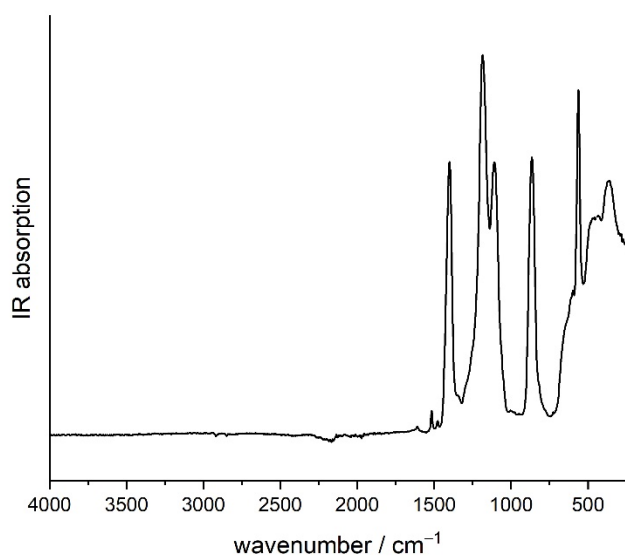

Figure S 3. IR (ATR, 25 °C) of **1**. The absence of bands around 3000  $\text{cm}^{-1}$  and 960  $\text{cm}^{-1}$  indicates the absence of residual  $\text{HSO}_3\text{F}$ .

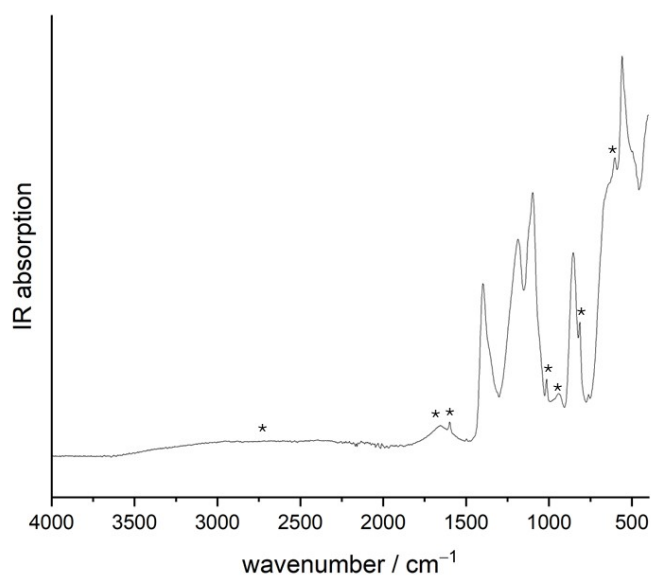

Figure S 4. IR (ATR, 25 °C) of **1** using toluene as a solvent for the synthesis. Bands corresponding to residual  $\text{HSO}_3\text{F}$ , as well as *p*-toluenesulfonic acid (which was isolated as colorless crystals from the reaction mixture) are marked with an asterisk. This indicates that electrophilic aromatic substitution is happening as a side reaction.

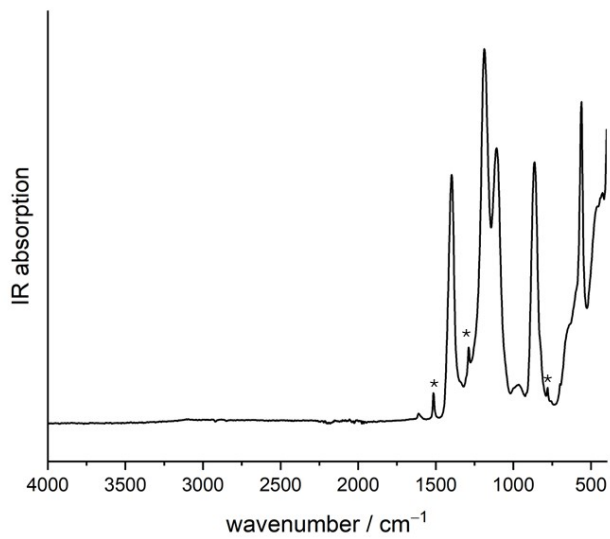

Figure S 5. IR (ATR, 25 °C) of **1** using oDFB as a solvent for the synthesis. Residual bands (marked with asterisks) of the solvent are visible still after hours of drying in high vacuum suggesting the formation of a solvent adduct. Compared to neat oDFB the bands are shifted by about 20-30  $\text{cm}^{-1}$ .

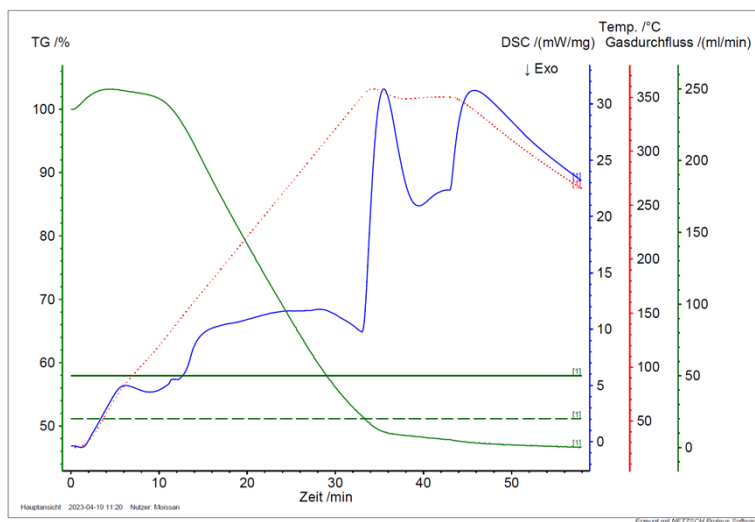

Figure S 6. Thermogravimetric analysis (green curve) and differential scanning calorimetry (blue curve) of **1**.

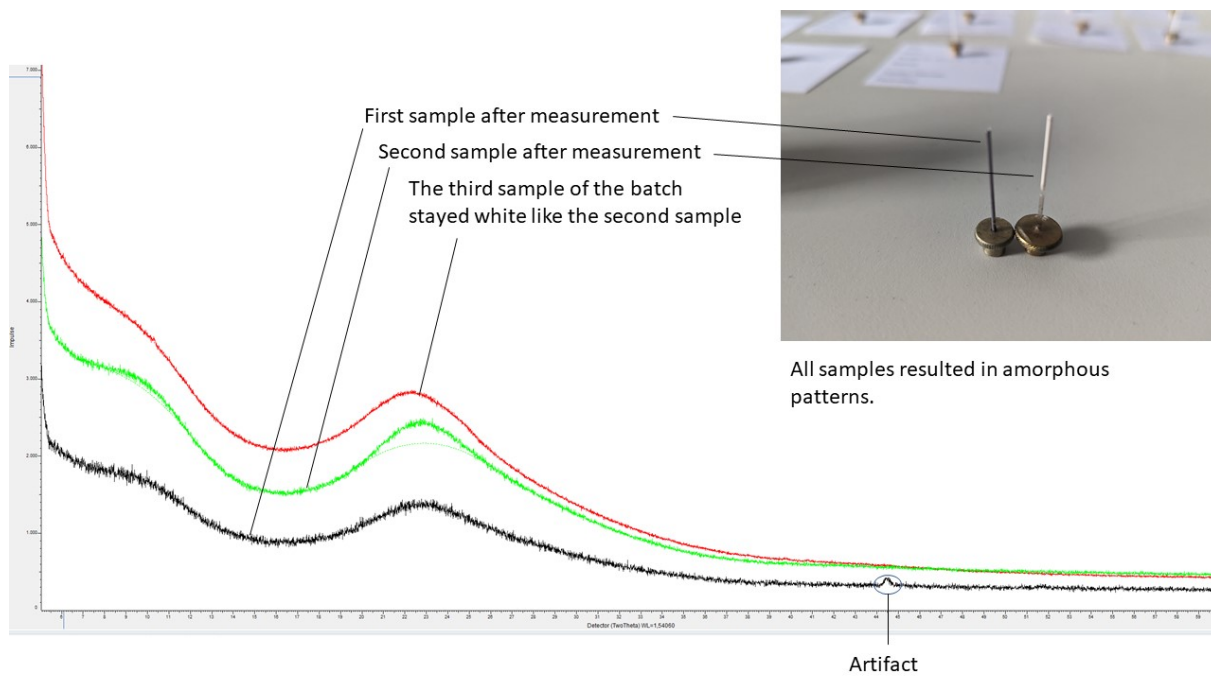

Figure S 7.: Powder XRD of 1.

### 3. Testing the Lewis acidity of AFS

#### 3.1. AFS·CD<sub>3</sub>CN (2)

Fluorosulfuric acid (450 mg, 4.5 mmol, 3 eq.) was transferred onto a frozen solution of AlMe<sub>3</sub> (2M, in hexane 108 mg, 1.5 mmol) in deuterated acetonitrile at -80 °C. The mixture was gradually warmed to room temperature and a colorless solution was obtained. The solution was vigorously stirred for an additional hour at room temperature until all gas evolution had ceased. Afterwards, all volatiles were pumped off leading to the isolation of a colorless solid (520 mg).

**IR (ATR, 25 °C):**  $\tilde{\nu}$  = 3010 (vw), 2943 (vw), 2336 (w), 2309 (vw), 1372 (m), 1303 (m), 1229 (s), 1066 (vs), 940 (w), 785 (s), 665 (vs), 558 (vs) cm<sup>-1</sup>. **<sup>1</sup>H NMR (400 MHz, acetonitrile-d<sub>3</sub>, 25 °C):**  $\delta$  = 2.0 (s, MeCN) ppm. **<sup>19</sup>F NMR (377 MHz, acetonitrile-d<sub>3</sub>, 25 °C):**  $\delta$  = 39.6 (s, [Al(SO<sub>3</sub>F)<sub>4</sub>(MeCN)<sub>2</sub>]<sup>-</sup>), 38.9 (s, [Al(SO<sub>3</sub>F)<sub>3</sub>(MeCN)<sub>3</sub>]), 38.6 (s, [Al(SO<sub>3</sub>F)<sub>2</sub>(MeCN)<sub>4</sub>]<sup>+</sup>) ppm. **<sup>27</sup>Al NMR (104 MHz, acetonitrile-d<sub>3</sub>, 25 °C):**  $\delta$  = -15 (s), -22 (m) ppm.

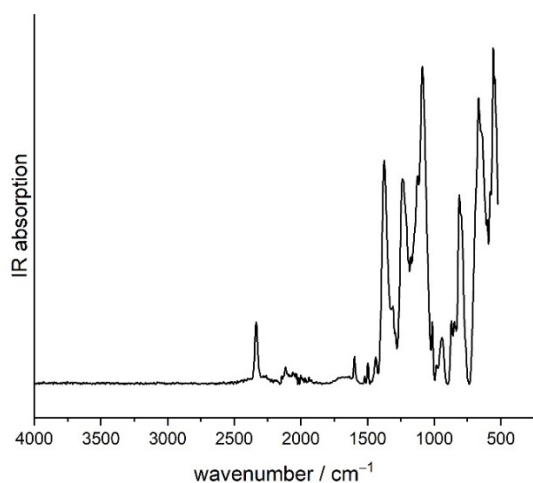

Figure S 8. IR (ATR, 25 °C) of **2**.  $\tilde{\nu}$  (C≡N) = 2336 cm<sup>-1</sup>.

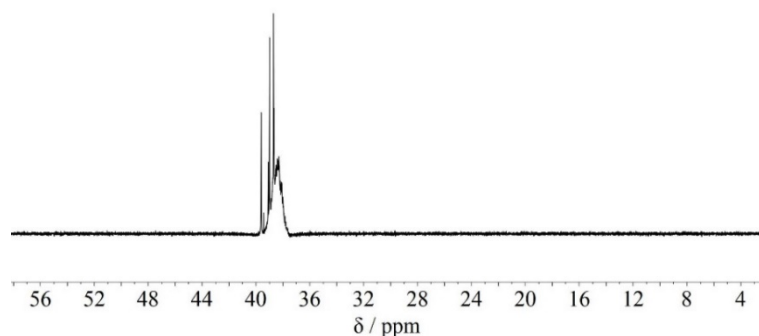

Figure S 9. <sup>19</sup>F NMR (377 MHz, acetonitrile-d<sub>3</sub>, 25 °C) of **2**. The autoionization of **2** is visible, a phenomenon previously described for other nitrile adducts of Lewis acids.<sup>[7]</sup>



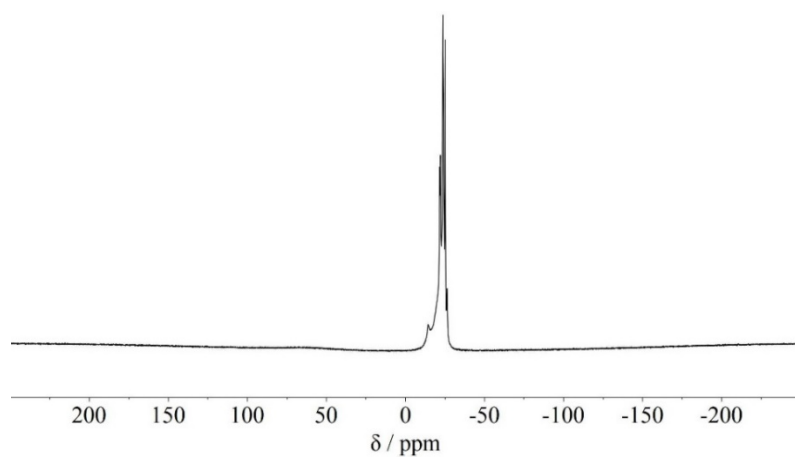

Figure S 10.  $^{27}\text{Al}$  NMR (104 MHz, acetonitrile- $\text{d}_3$ , 25 °C) of **2**. The autoionization of **2** is visible, a phenomenon previously described for other nitrile adducts of Lewis acids.<sup>[7]</sup>

### 3.2. Gutmann-Beckett method.

A solution of  $\text{OPEt}_3$  (3 mg, 0.22 mmol, 1 eq.) in  $\text{CH}_2\text{Cl}_2$  was added to **1** (7 mg, 0.22 mmol) at room temperature. A clear solution was obtained, that was stirred for 10 minutes. All volatiles were removed in vacuo leading to the isolation of a colorless powder.

$^1\text{H}$  NMR (400 MHz, methylene chloride- $d_2$ , 25 °C):  $\delta = 2.13$  (m, 6H,  $-\text{OPEt}_3$ ), 1.31 (m, 9H,  $-\text{OPEt}_3$ ) ppm.  $^{19}\text{F}$  NMR (377 MHz, methylene chloride- $d_2$ , 25 °C):  $\delta = 37.2$  (s, br) ppm.  $^{27}\text{Al}$  NMR (107 MHz, methylene chloride- $d_2$ , 25 °C):  $\delta = -14$  (s) ppm.  $^{31}\text{P}$   $\{^1\text{H}\}$  NMR (162 MHz, methylene chloride- $d_2$ , 25 °C):  $\delta = 87.8$  (s), 76.4 (s, br) ppm.

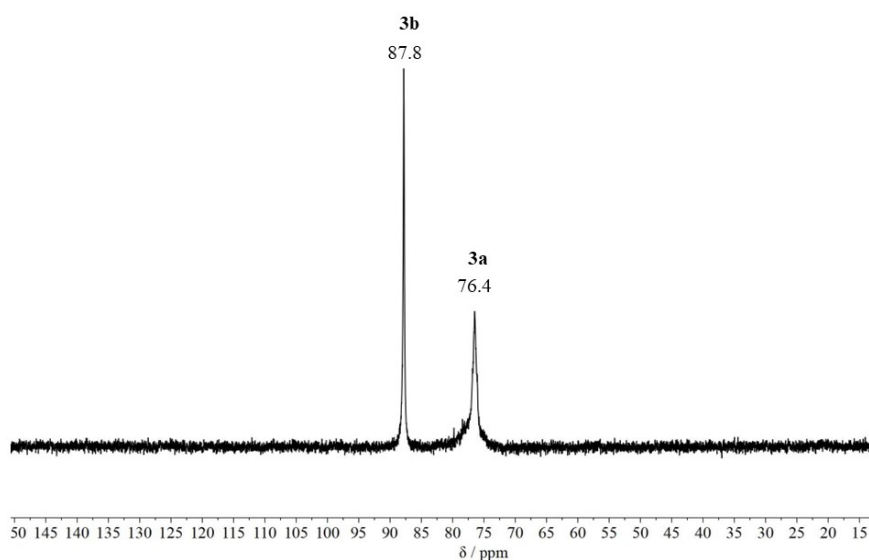

Figure S 11.  $^{31}\text{P}\{^1\text{H}\}$  NMR (162 MHz, methylene chloride- $d_2$ , 25 °C) of **3**. The spectrum shows one signal at higher fields corresponding to  $\text{Et}_3\text{PO}$  interacting with **1** (**3a**) and one signal at lower fields corresponding to chemisorbed  $\text{Et}_3\text{PO}$  (**3b**).

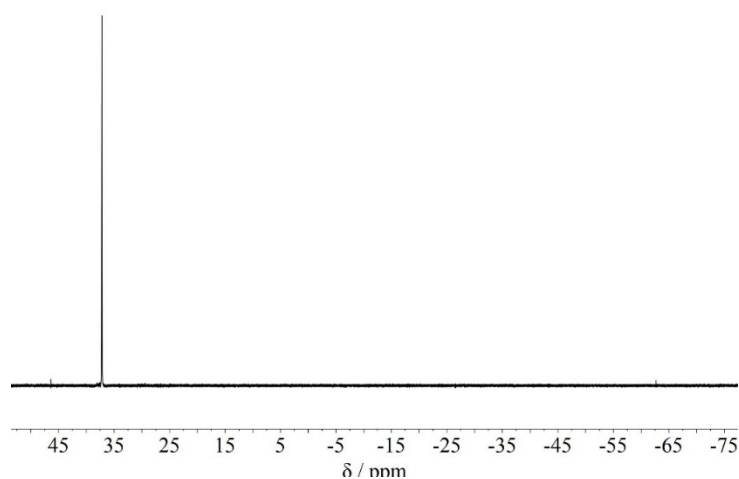

Figure S 12.  $^{19}\text{F}$  NMR (377 MHz, methylene chloride- $d_2$ , 25 °C) of **3**.

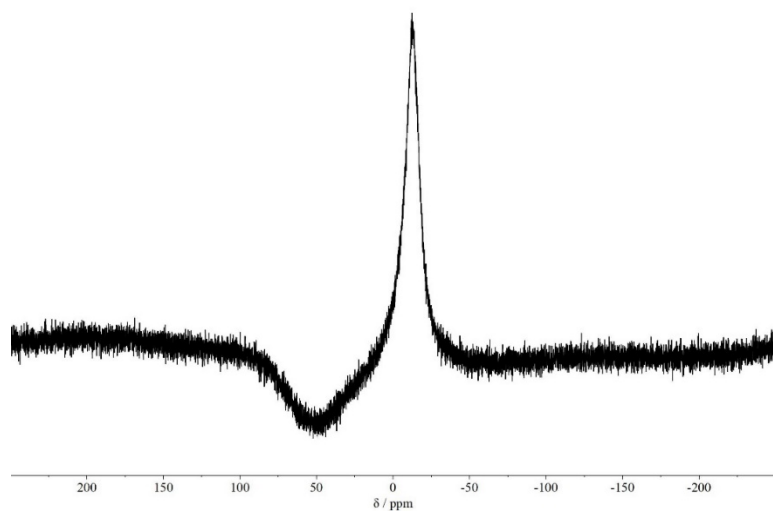

Figure S 13.:  $^{27}\text{Al}$  NMR (107 MHz, methylene chloride- $\text{d}_2$ , 25 °C) of **3**.

### 3.3. Competition experiment with $[\text{PPh}_4][\text{SbF}_6]$ .

Stoichiometric amounts of **1** (10 mg, 0.030 mmol) and  $[\text{PPh}_4][\text{SbF}_6]$  (17 mg, 0.30 mmol) were placed in a *J. Young* NMR tube and mixed in acetonitrile. A yellowish solution was obtained.

$^1\text{H}$  NMR (400 MHz, acetonitrile- $d_3$ , 25 °C):  $\delta = 7.95$  (m, 4H, para-H,  $[\text{PPh}_4]^+$ ), 7.78 (m, 8H, meta-H,  $[\text{PPh}_4]^+$ ), 7.73 (m, 8H, ortho-H,  $[\text{PPh}_4]^+$ ) ppm.  $^{19}\text{F}$  NMR (377 MHz, acetonitrile- $d_3$ , 25 °C):  $\delta = 39.3$  (s), 38.6 (s), 37.0 (s, br), -114.2 (s), -126.8 (m), -132.1 (m), -158.9 (m) ppm.  $^{27}\text{Al}$  NMR (107 MHz, acetonitrile- $d_3$ , 25 °C):  $\delta = -15$  (s) ppm.

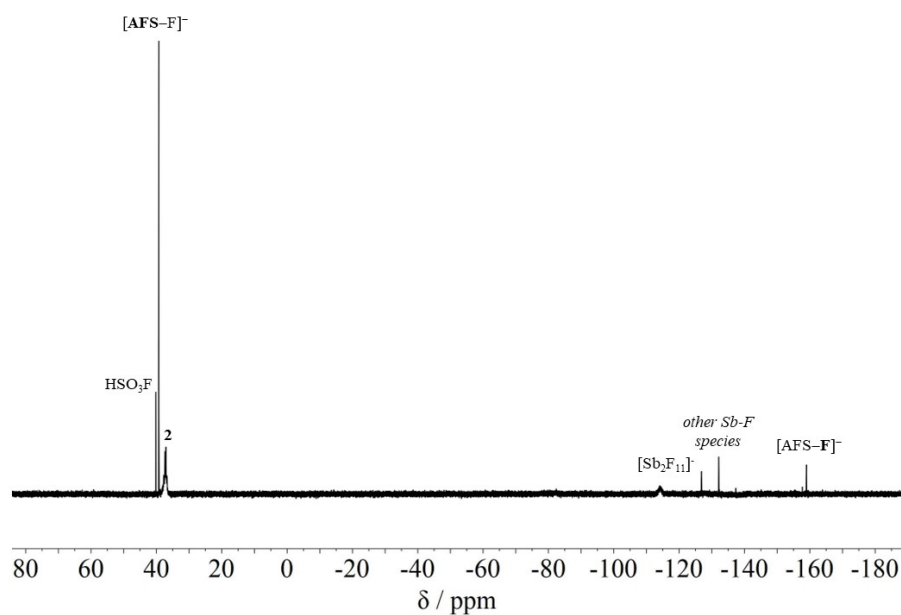

Figure S 14.  $^{19}\text{F}$  NMR (377 MHz, acetonitrile- $d_3$ , 25 °C) of the competition reaction between **1** and  $[\text{PPh}_4][\text{SbF}_6]$  in acetonitrile. The signal for the  $[\text{SbF}_6]^-$  ion is not present anymore and instead signals corresponding to the formation of  $[\text{Sb}_2\text{F}_{11}]^-$  and other Sb-F species are visible. Furthermore, signals corresponding to the formation of a fluoride adduct of AFS, as well as  $\text{HSO}_3\text{F}$  and **2** can be found.

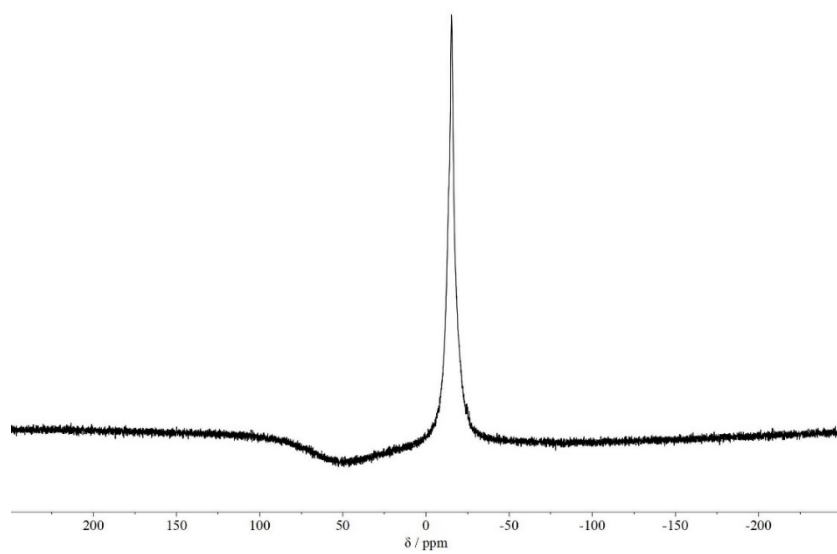

Figure S 15.:  $^{27}\text{Al}$  NMR (107 MHz, acetonitrile- $d_3$ , 25 °C) of the competition experiment between **1** and  $[\text{PPh}_4][\text{SbF}_6]$  in acetonitrile.

## 4. Testing the reactivity of AFS

### 4.1. Halide Abstraction Reaction with Ph<sub>3</sub>CCl.

A solution of Ph<sub>3</sub>CCl (7 mg, 0.23 mmol, 0.92 eq) in DCM (1.0 mL) was added to **1** (88 mg, 0.25 mmol). Immediately, the solution turned bright yellow, and a bright yellow solid precipitated. The mixture was stirred for one week at room temperature. Afterward, all volatiles were pumped off and the remaining yellow solid was washed with *n*-pentane and dried in vacuo leading to the isolation of a bright yellow powder (127 mg, 92%).

**<sup>1</sup>H NMR (400 MHz, methylene chloride-d<sub>2</sub>, 25 °C):** δ = 8.34 (br, 3H, para-H, [Ph<sub>3</sub>C]<sup>+</sup>), 7.96 (br, 6H, meta-H, [Ph<sub>3</sub>C]<sup>+</sup>), 7.75 (br, 6H, ortho-H, [Ph<sub>3</sub>C]<sup>+</sup>) ppm. **<sup>19</sup>F NMR (377 MHz, methylene chloride-d<sub>2</sub>, 25 °C):** δ = 38.3 (s) ppm. **<sup>27</sup>Al NMR (107 MHz, methylene chloride-d<sub>2</sub>, 25 °C):** δ = -13 (s) ppm.

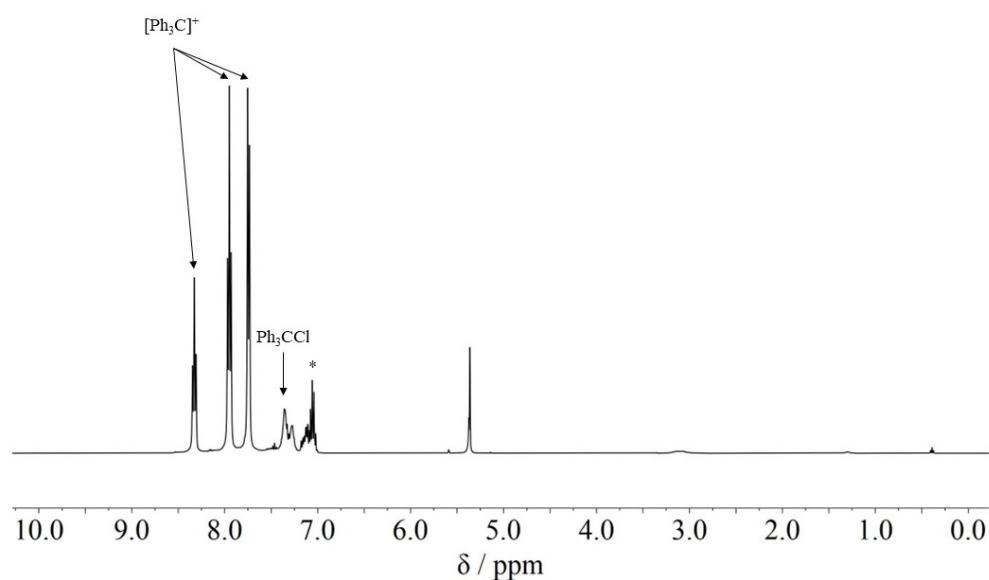

Figure S 16. <sup>1</sup>H NMR (400 MHz, methylene chloride-d<sub>2</sub>, 25 °C) of chloride abstraction reaction between **1** and Ph<sub>3</sub>CCl. The asterisk marks some unidentified side product.

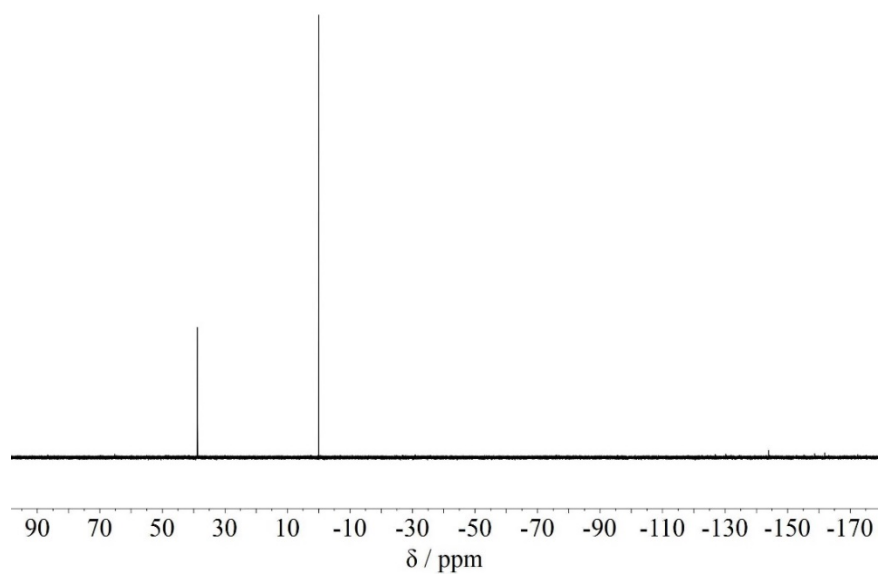

Figure S 17.  $^{19}\text{F}$  NMR (377 MHz, methylene chloride- $\text{d}_2$ , 25 °C) of chloride abstraction reaction between **1** and  $\text{Ph}_3\text{CCl}$ .

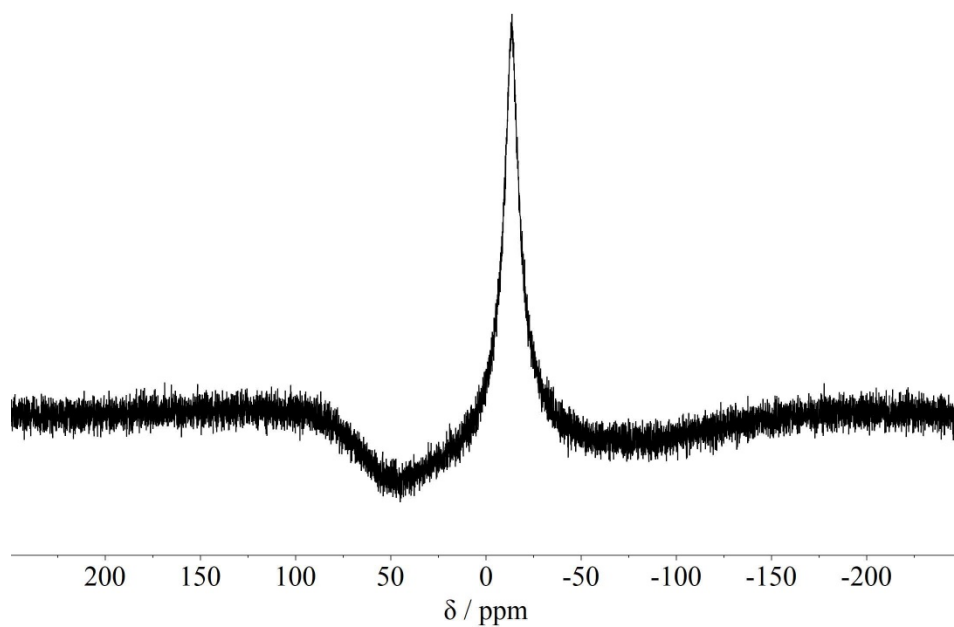

Figure S 18.  $^{27}\text{Al}$  NMR (107 MHz, methylene chloride- $\text{d}_2$ , 25 °C) of chloride abstraction reaction between **1** and  $\text{Ph}_3\text{CCl}$ .

#### 4.2. Halide Abstraction Reaction with $\text{Ph}^{\text{F}}_3\text{CCl}$ .

A suspension of **1** (12.5 mg, 0.038 mmol) in  $\text{SO}_2$  (1 mL) was cooled to  $-80\text{ }^\circ\text{C}$ . Afterwards,  $\text{Ph}^{\text{F}}_3\text{CCl}$  (21 mg, 0.038 mmol, 1.0 eq.) was added and the reaction mixture was slowly brought to room temperature, while vigorously stirred. During that time, the colorless suspension turned violet-red.

$^{19}\text{F}$  NMR (377 MHz,  $\text{SO}_2$ , ext. acetone- $\text{d}_6$ ,  $25\text{ }^\circ\text{C}$ ):  $\delta = 43.9$  (s),  $-138.6$  (m),  $-149.4$  (m),  $-160.1$  (m).

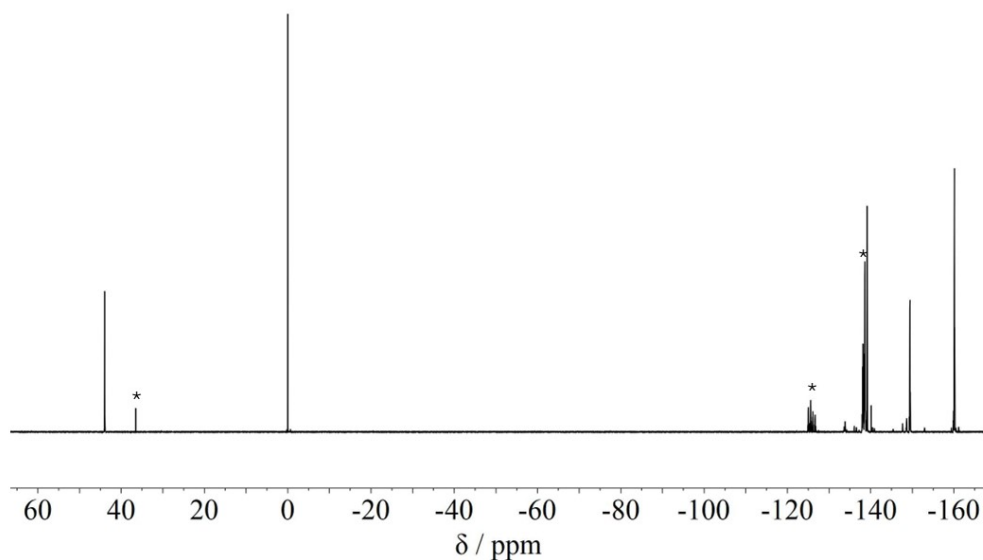

Figure S 19.  $^{19}\text{F}$  NMR (377 MHz,  $\text{SO}_2$ , ext. acetone- $\text{d}_6$ ,  $25\text{ }^\circ\text{C}$ ) of the chloride abstraction reaction between **1** and  $\text{Ph}^{\text{F}}_3\text{CCl}$ . Asterisks mark some unidentified side products.

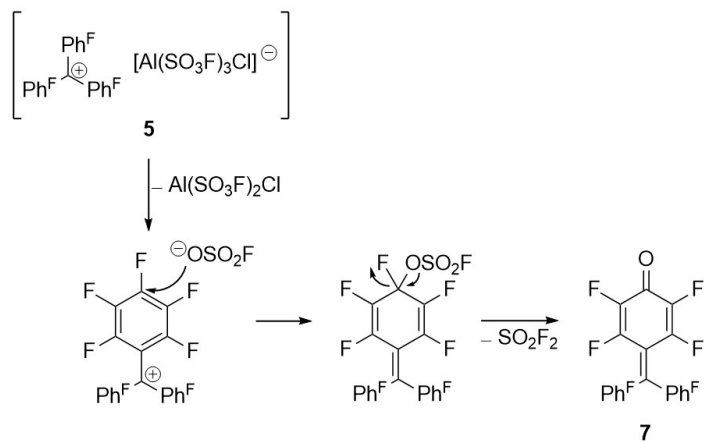

Figure S 20. Proposed mechanism for the formation of ketone **7**.



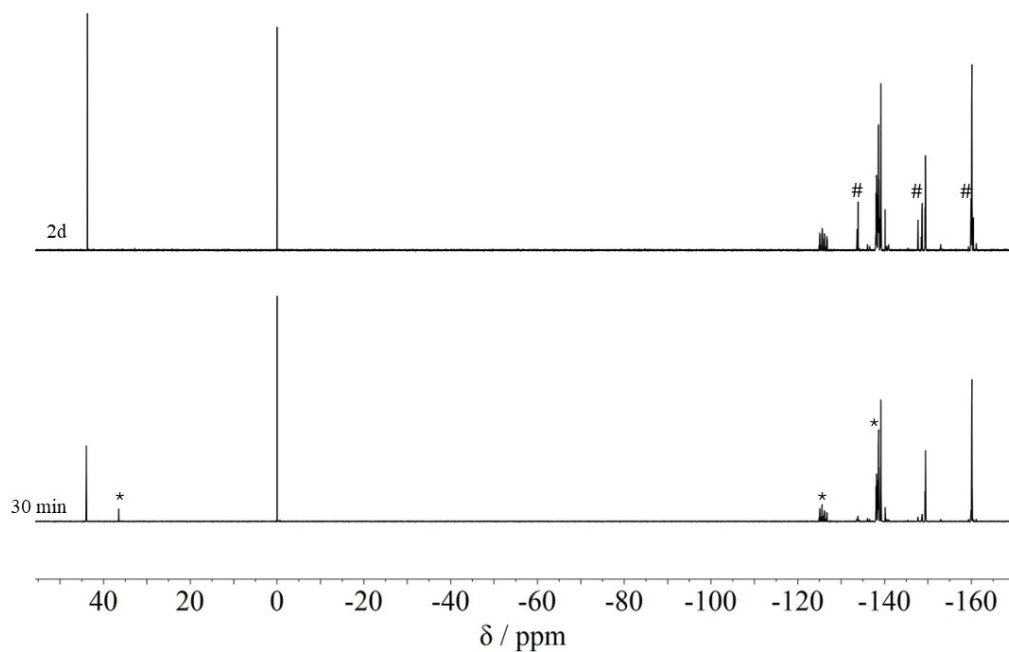

Figure S 21.  $^{19}\text{F}$  NMR (377 MHz,  $\text{SO}_2$ , ext. acetone- $d_6$ , 25 °C) of the reaction between **1** and  $\text{PhF}_3\text{CCl}$ . After some time, signals corresponding to ketone **7** appear (#) in addition to fluorosulfate **6**. Asterisks mark some unidentified side products.

Tab S1.: Calculated absorption maxima of **6** and **7** (B3LYP-D3(BJ)-def2-TZVP).

| compound | Absorption maximum/<br>wavelength [nm] | fosc        |
|----------|----------------------------------------|-------------|
| <b>6</b> | 252 ( $S_0 \rightarrow S_4$ )          | 0.091913997 |
| <b>7</b> | 426 ( $S_0 \rightarrow S_2$ )          | 0.482531664 |

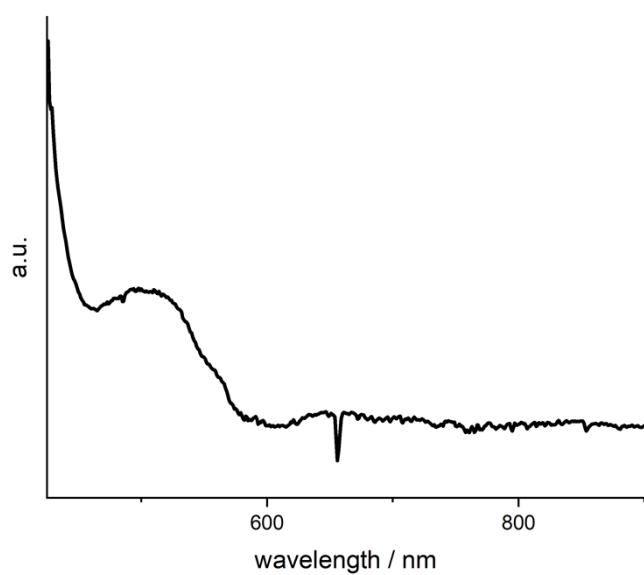

Figure S 22. UV-Vis spectrum of the reaction mixture of **1** and  $\text{PhF}_3\text{CCl}$ .

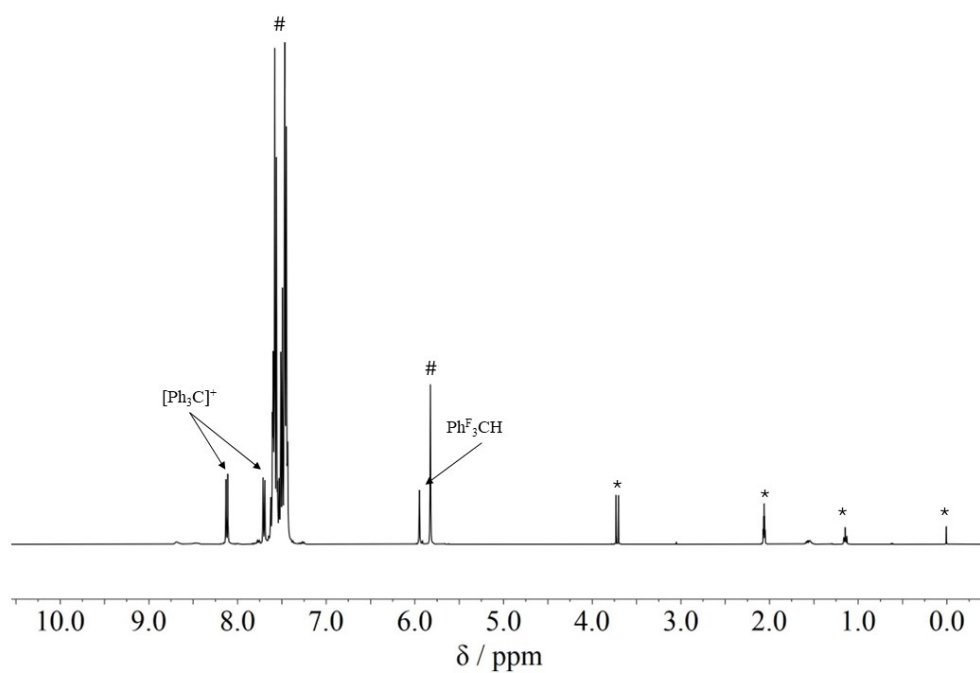

Figure S 23.  $^1\text{H}$  NMR (400 MHz,  $\text{SO}_2$ , ext. acetone- $\text{d}_6$ , 25 °C) after the addition of  $\text{Ph}_3\text{CH}$  to the reaction mixture of the reaction between **1** and  $\text{PhF}_3\text{CCl}$ . The signals of the formed trityl cation  $[\text{Ph}_3\text{C}]^+$  are partly superimposed by the signals corresponding to unreacted  $\text{Ph}_3\text{CH}$ . The signal corresponding to perfluorotriptyl methane is visible. Asterisks mark the signals of the capillary, and cross mark unreacted  $\text{Ph}_3\text{CH}$ .

### 4.3. Deoxygenation of Et<sub>3</sub>PO

A solution of Et<sub>3</sub>PO (6 mg, 0.44 mmol, 1.0 eq.) in CH<sub>2</sub>Cl<sub>2</sub> was added at room temperature to a fresh sample of **1** (14 mg, 0.44 mmol), that was not dried overnight under high vacuum at 40 °C. A clear solution was obtained, that was stirred for one day. The reaction progress was monitored through <sup>31</sup>P and <sup>19</sup>F NMR spectroscopy. All volatiles were removed *in vacuo* leading to the isolation of a colorless, crystalline powder.

<sup>31</sup>P {<sup>1</sup>H} NMR (162 MHz, methylene chloride-d<sub>2</sub>, 25 °C): δ = 149.4 (d) ppm. <sup>19</sup>F NMR (377 MHz, methylene chloride-d<sub>2</sub>, 25 °C): δ = 38.5 (s) ppm. <sup>27</sup>Al NMR (107 MHz, methylene chloride-d<sub>2</sub>, 25 °C): δ = -12 (s) ppm.

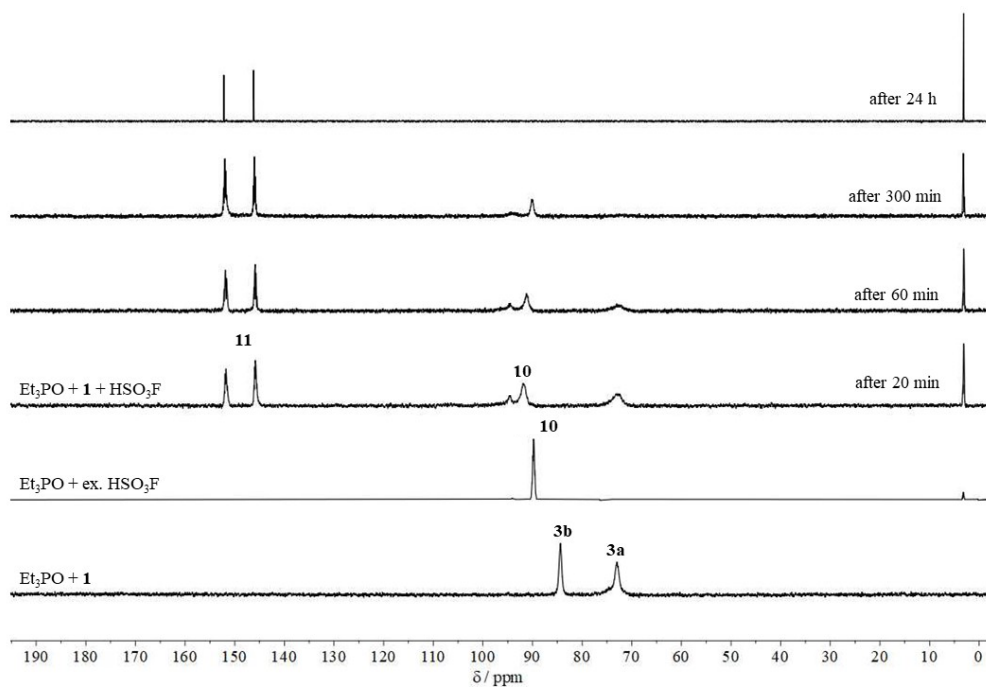

Figure S 24.: Stacked <sup>31</sup>P NMR (162 MHz, methylene chloride-d<sub>2</sub>, 25 °C) spectra of the deoxygenation of Et<sub>3</sub>PO by HSO<sub>3</sub>F and **1**.

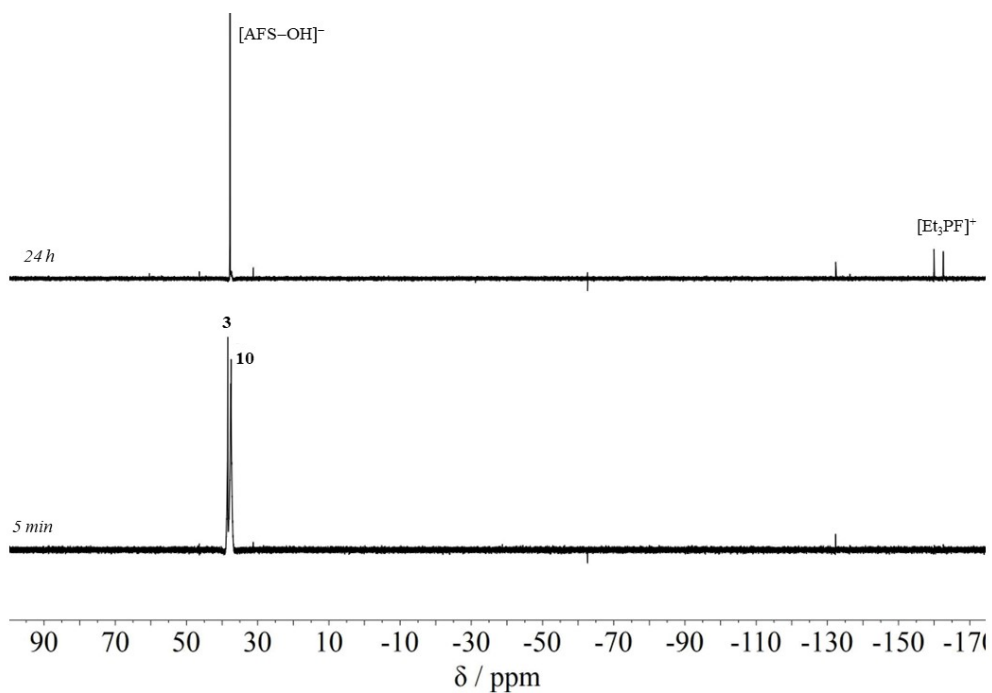

Figure S 25.  $^{19}\text{F}$  NMR (377 MHz, methylene chloride- $d_2$ , 25 °C) of the reaction between **1** and  $\text{Et}_3\text{PO}$  in the presence of residual  $\text{HSO}_3\text{F}$ . After 5 minutes signals are observed that can be attributed to the Gutmann-Beckett complex **3**, and phosphonium species **10**. After 24h only signals corresponding to the fluorophosphonium cation and its counter anion are visible.

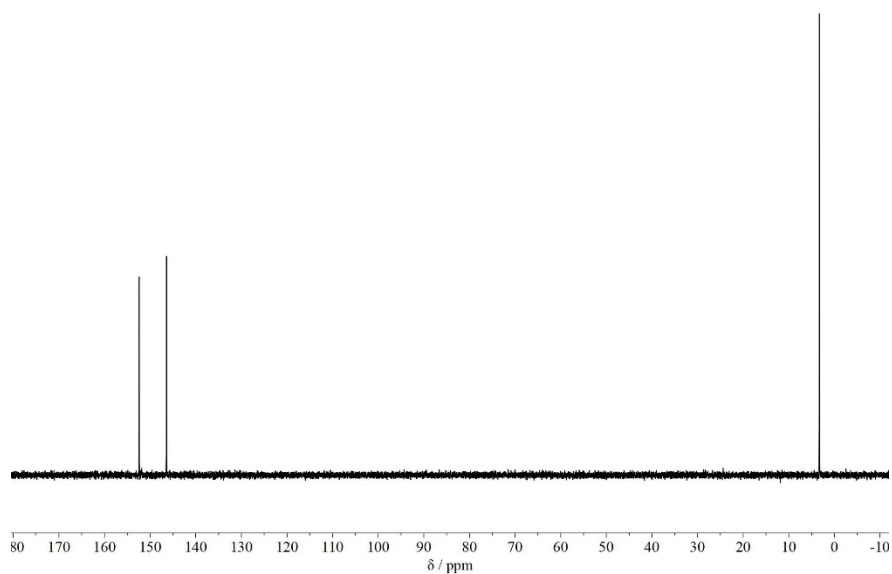

Figure S 26.:  $^{31}\text{P}$   $\{^1\text{H}\}$  NMR (162 MHz, methylene chloride- $d_2$ , 25 °C) of fluorophosphonium species **11**.

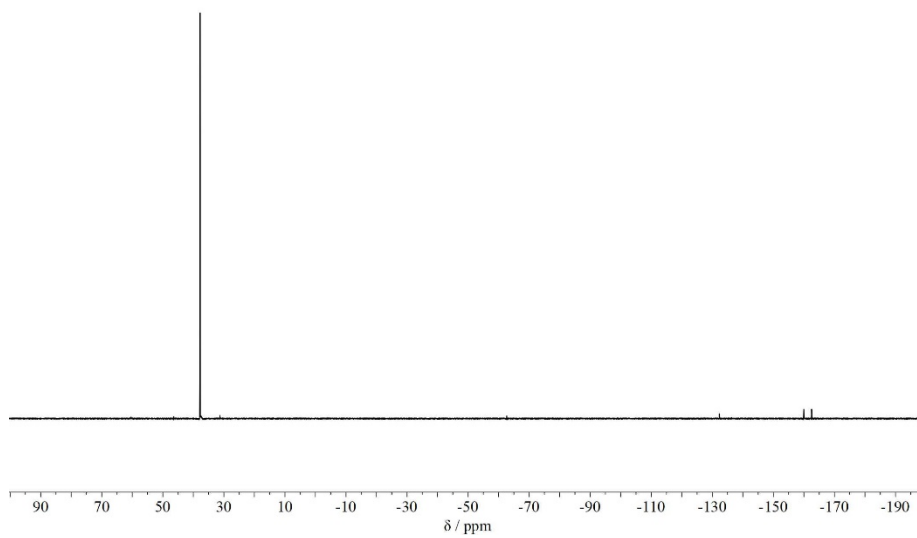

Figure S 27.:  $^{19}\text{F}$  NMR (377 MHz, methylene chloride- $\text{d}_2$ , 25 °C) of fluorophosphonium species **11**.

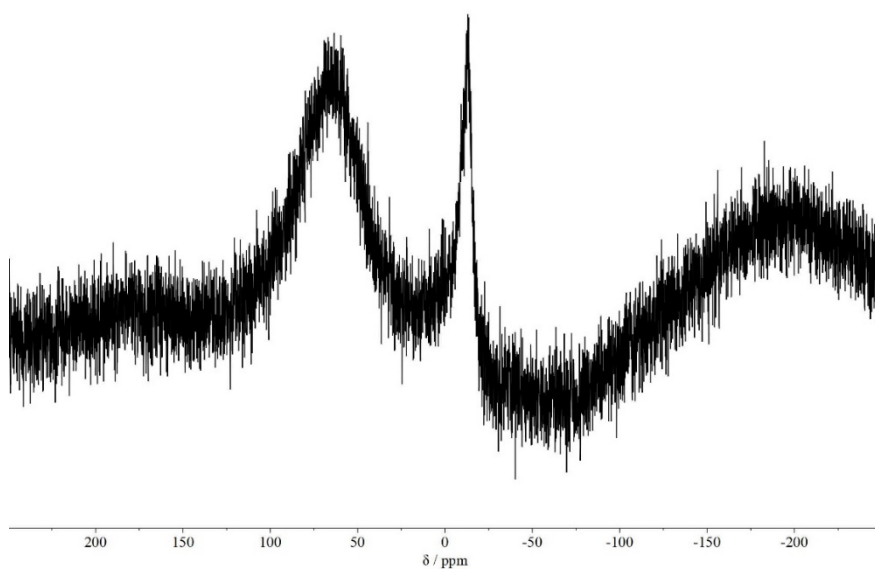

Figure S 28.:  $^{27}\text{Al}$  NMR (107 MHz, methylene chloride- $\text{d}_2$ , 25 °C) of fluorophosphonium species **11**.

## 5. Testing the catalytic activity

### 5.1. General procedure for C–F activation reactions

**1** (30 mg or 10 mg) was placed in a *J. Young* NMR tube and combined with Et<sub>3</sub>SiH (0.2 mmol). Then, the fluoroalkane (0.2 mmol) was added and a gas evolution was observed. DCM-d<sub>2</sub> was added to the reaction mixture. The NMR tube was vigorously shaken and the reaction progress was monitored via <sup>1</sup>H and <sup>19</sup>F NMR spectroscopy in different time intervals. A capillary, containing CFCl<sub>3</sub>, was added as external standard.

Note: 30 mg of AFS ( $M = 324.17 \text{ g mol}^{-1}$ ) correspond to 46 mol% taking all deployed Al atoms into account; including bulk atoms (100% acidic sites). However, due to the heterogenous nature of the catalytic reaction only a fraction of the Al atoms will be catalytically active. For related catalysts (ACF, ACF teflate) around 10% acidic sites were assumed, following NH<sub>3</sub>-TPD measurements which estimate the number of Lewis-acidic sites for HS-AlF<sub>3</sub> to be 0.978 mmol g<sup>-1</sup> and for ACF roughly 1 mmol g<sup>-1</sup>.<sup>[8]</sup>

Two comparative experiments using 10 mg of AFS (15 mol%, assuming 100% acidic sites) were performed both for 1-fluoropentane (0.2 mmol) and 1-fluoroheptane (0.2 mmol) in the presence of Et<sub>3</sub>SiH (0.2 mmol) (Fig. S33). For 1-fluoropentane a conversion of 65% after 24 h was observed, for 1-fluoroheptane the yield was 49% after 24 h.

### 5.2. NMR spectra of C–F activation reactions

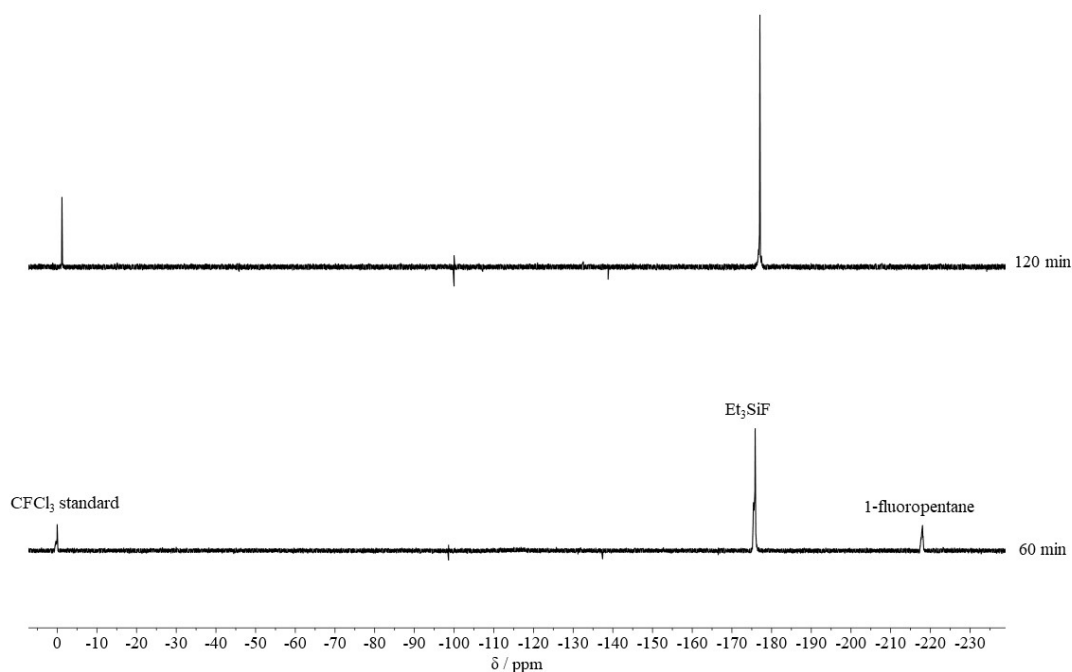

Figure S 29. Stacked <sup>19</sup>F NMR spectra (377 MHz, methylene chloride-d<sub>2</sub>, 25 °C) of the reaction of 1-fluoro pentane with Et<sub>3</sub>SiH in the presence of **1**. After 2 h 1-fluoropentane ( $\delta(^{19}\text{F}) = -217 \text{ ppm}$ ) is quantitatively consumed and Et<sub>3</sub>SiF ( $\delta(^{19}\text{F}) = -175 \text{ ppm}$ ) is produced.

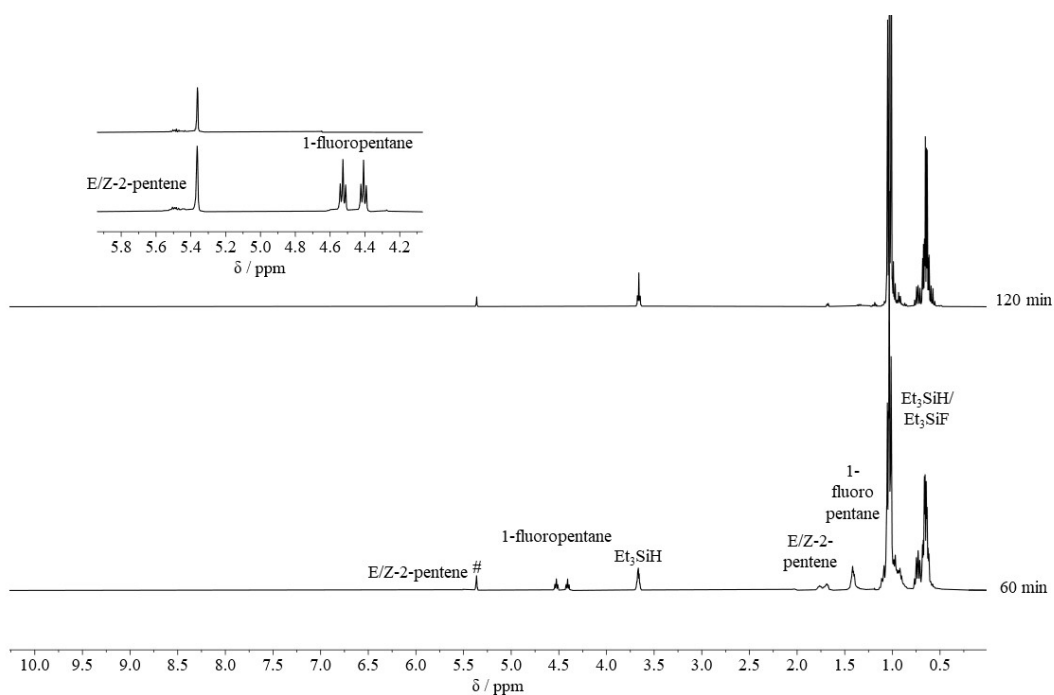

Figure S 30.: Stacked  $^1\text{H}$  NMR spectra (400 MHz, methylene chloride- $\text{d}_2$ , 25  $^\circ\text{C}$ ) of the reaction of 1-fluoropentane with  $\text{Et}_3\text{SiH}$  in the presence of **1**. After 2 h 1-fluoropentane is quantitatively consumed. The cross marks  $\text{CD}_2\text{Cl}_2$ .

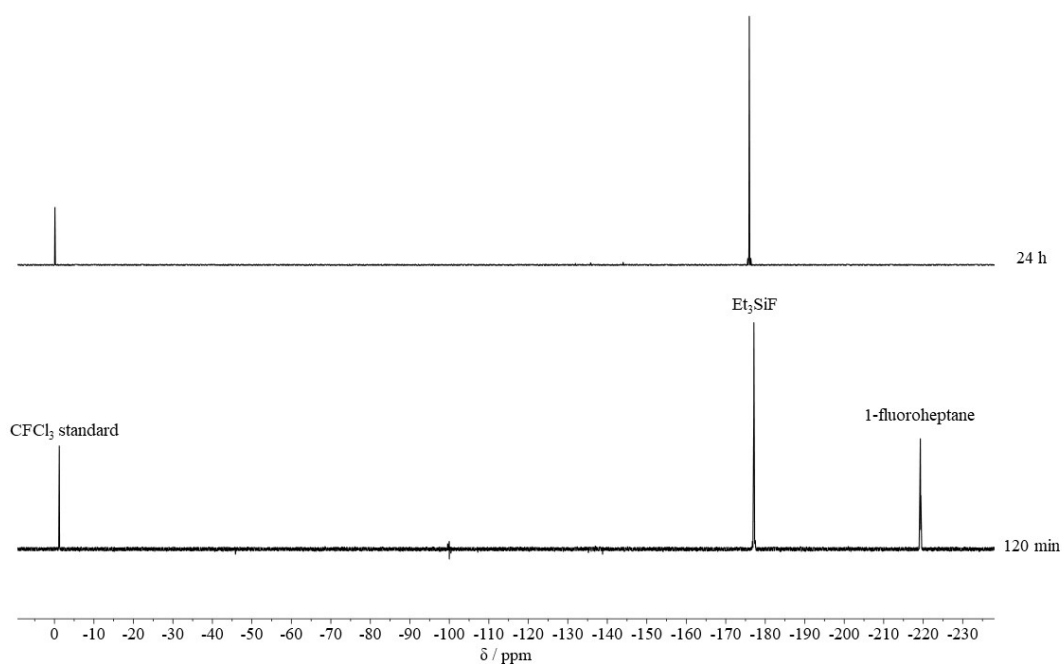

Figure S 31.: Stacked  $^{19}\text{F}$  NMR spectra (377 MHz, methylene chloride- $\text{d}_2$ , 25  $^\circ\text{C}$ ) of the reaction of 1-fluoroheptane with  $\text{Et}_3\text{SiH}$  in the presence of **1**. After 24 h 1-fluoroheptane ( $\delta(^{19}\text{F}) = -218$  ppm) is quantitatively consumed and  $\text{Et}_3\text{SiF}$  ( $\delta(^{19}\text{F}) = -175$  ppm) is produced.

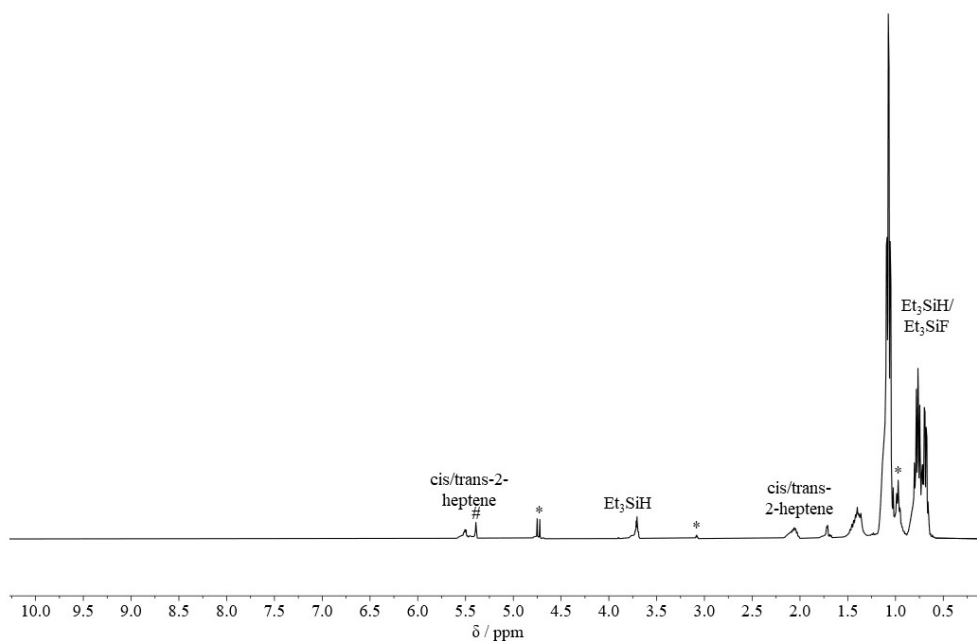

Figure S 32.:  $^1\text{H}$  NMR spectrum (400 MHz, methylene chloride- $d_2$ , 25  $^\circ\text{C}$ ) of the reaction of 1-fluoroheptane with  $\text{Et}_3\text{SiH}$  in the presence of **1**. After 24 h 1-fluoroheptane is quantitatively consumed. Asterisks mark the external capillary. The cross marks  $\text{CD}_2\text{Cl}_2$ .

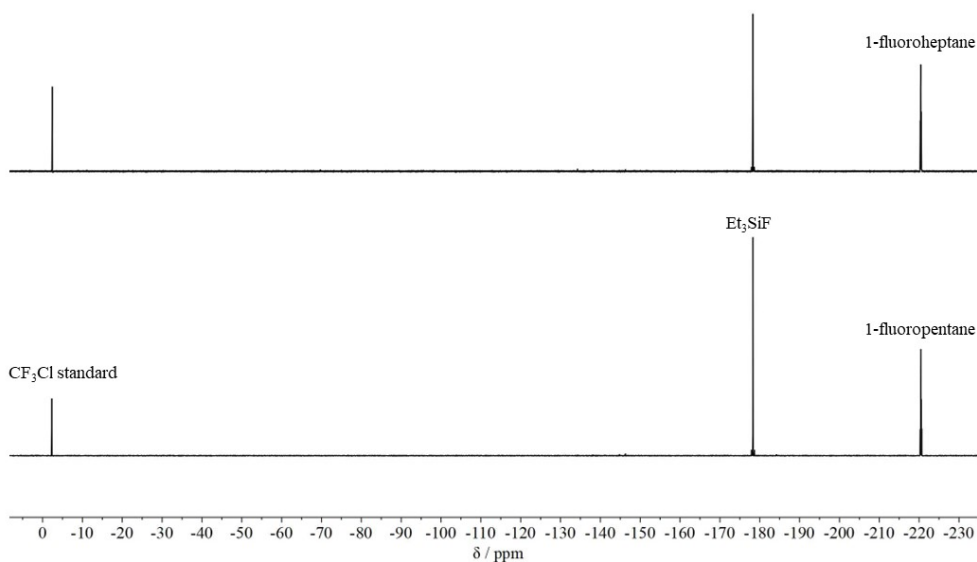

Figure S 33.: Stacked  $^{19}\text{F}$  NMR spectra (377 MHz, methylene chloride- $d_2$ , 25  $^\circ\text{C}$ ) of the reaction of 1-fluoropentane/1-fluoroheptane with  $\text{Et}_3\text{SiH}$  in the presence of **1** (10 mg).



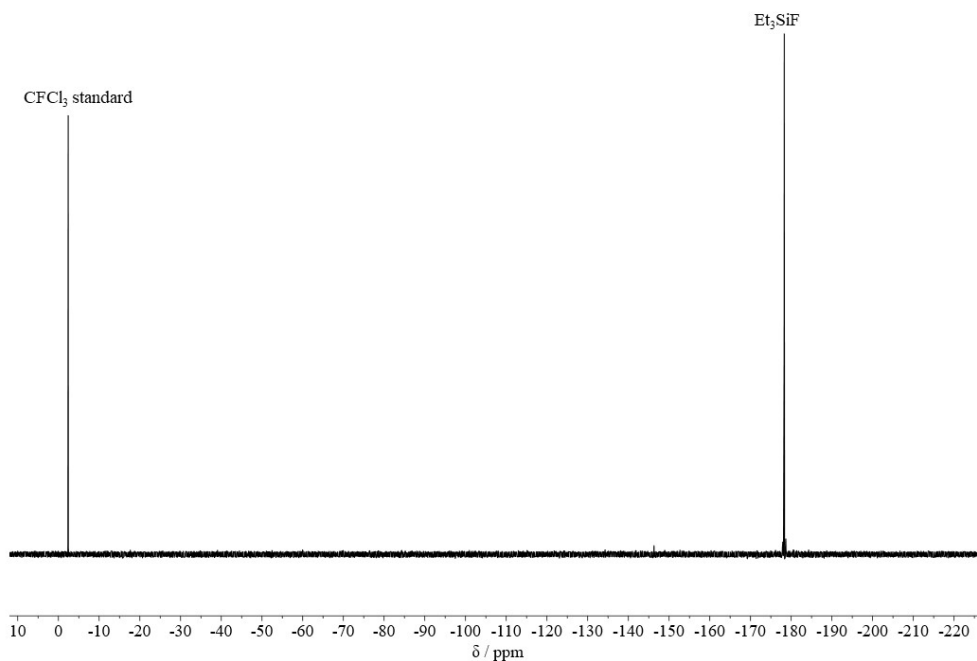

Figure S 34.:  $^{19}\text{F}$  NMR spectrum (377 MHz, methylene chloride- $d_2$ , 25 °C) of the reaction of 2-fluoropentane with Et<sub>3</sub>SiH in the presence of **1**. After 1 h 2-fluoropentane ( $\delta(^{19}\text{F}) = -173$  ppm) is quantitatively consumed and Et<sub>3</sub>SiF ( $\delta(^{19}\text{F}) = -175$  ppm) is produced.

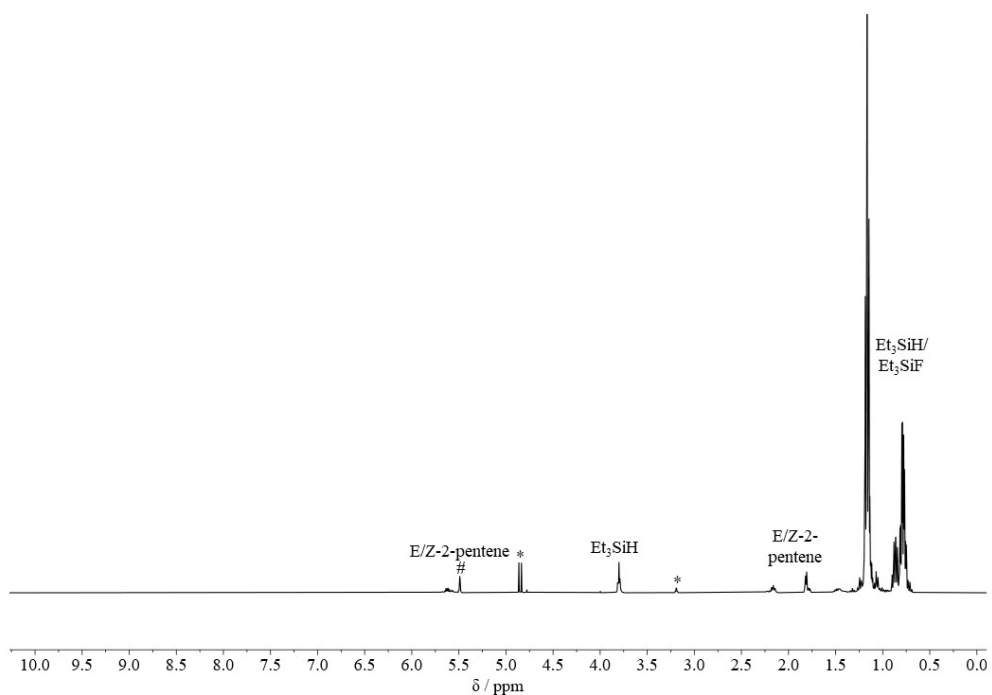

Figure S 35.:  $^1\text{H}$  NMR spectrum (400 MHz, methylene chloride- $d_2$ , 25 °C) of the reaction of 2-fluoropentane with Et<sub>3</sub>SiH in the presence of **1**. After 1 h 2-fluoropentane is quantitatively consumed. Asterisk mark the external capillary. The cross marks CD<sub>2</sub>Cl<sub>2</sub>.

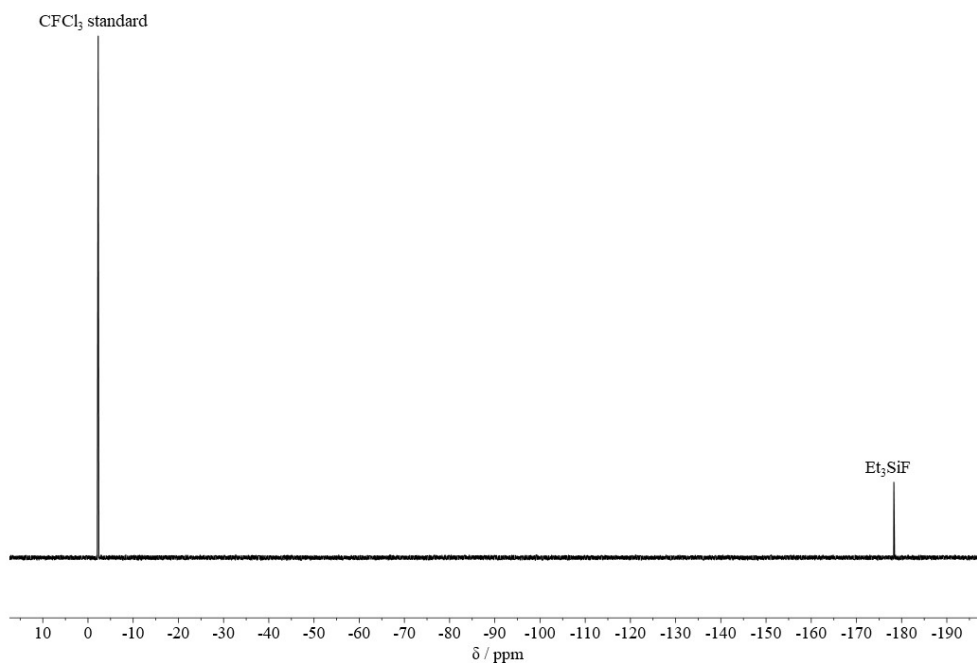

Figure S 36.:  $^{19}\text{F}$  NMR spectrum (377 MHz, methylene chloride- $d_2$ , 25 °C) of the reaction of 1-fluorocyclohexane with  $\text{Et}_3\text{SiH}$  in the presence of **1**. After 1 h 1-fluorocyclohexane ( $\delta(^{19}\text{F}) = -172$  ppm) is quantitatively consumed and  $\text{Et}_3\text{SiF}$  ( $\delta(^{19}\text{F}) = -175$  ppm) is produced.

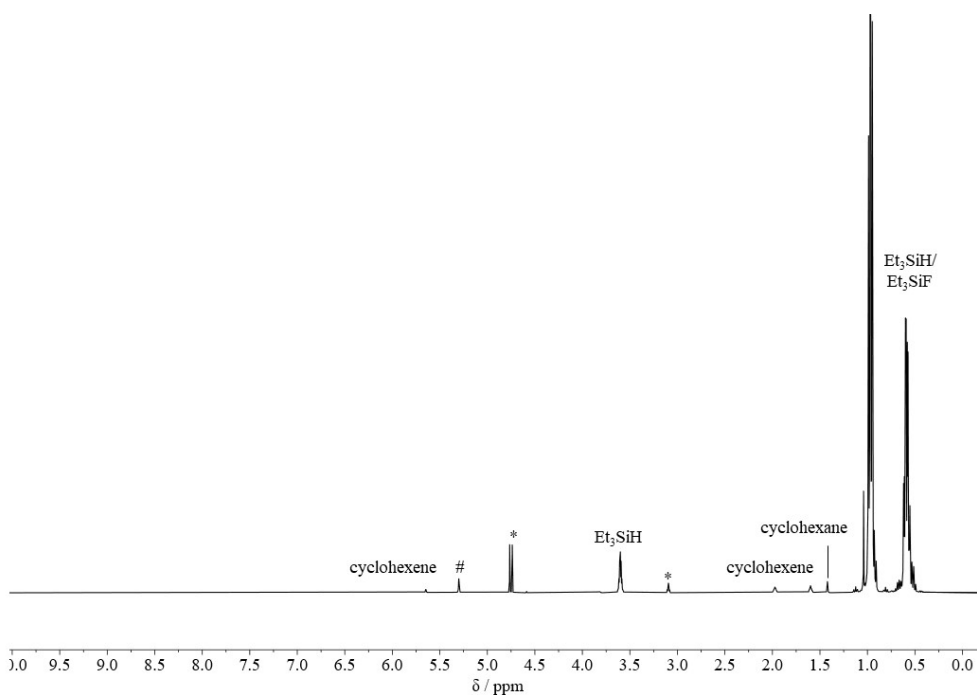

Figure S 37.:  $^1\text{H}$  NMR spectrum (400 MHz, methylene chloride- $d_2$ , 25 °C) of the reaction of 1-fluorocyclohexane with  $\text{Et}_3\text{SiH}$  in the presence of **1**. After 1 h 1-fluorocyclohexane ( $\delta(^1\text{H}) = 4.5$  ppm) is quantitatively consumed. Asterisk mark the external capillary. The cross marks  $\text{CD}_2\text{Cl}_2$ .

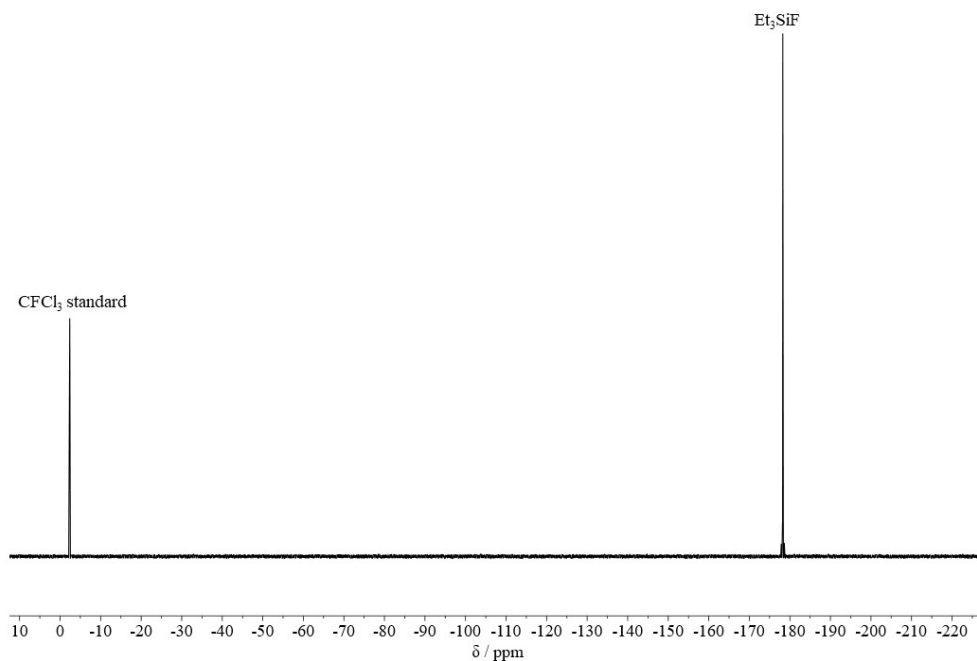

Figure S 38.:  $^{19}\text{F}$  NMR spectrum (377 MHz, methylene chloride- $\text{d}_2$ , 25 °C) of the reaction between Et<sub>3</sub>SiH and 1-fluoroadamantane in the presence of **1**. After 1 h 1-fluoroadamantane ( $\delta(^{19}\text{F}) = -128$  ppm) is completely consumed, and Et<sub>3</sub>SiF ( $\delta(^{19}\text{F}) = -175$  ppm) is produced.

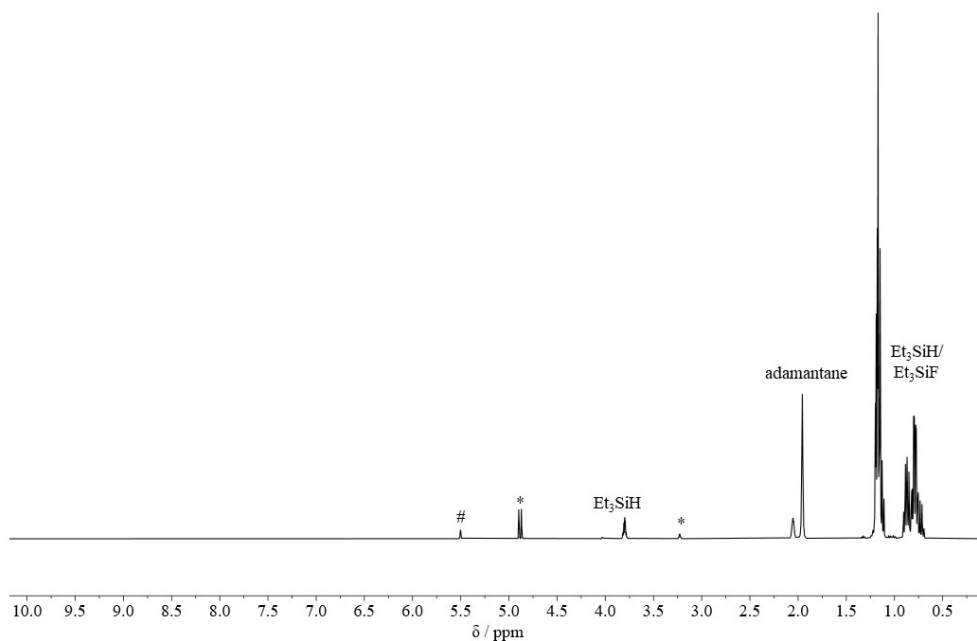

Figure S 39.:  $^1\text{H}$  NMR spectrum (400 MHz, methylene chloride- $\text{d}_2$ , 25 °C) of the reaction of 1-fluoroadamantane with Et<sub>3</sub>SiH in the presence of **1**. After 1 h 1-fluoroadamantane is quantitatively consumed. Asterisk mark the external capillary. The cross marks  $\text{CD}_2\text{Cl}_2$ .

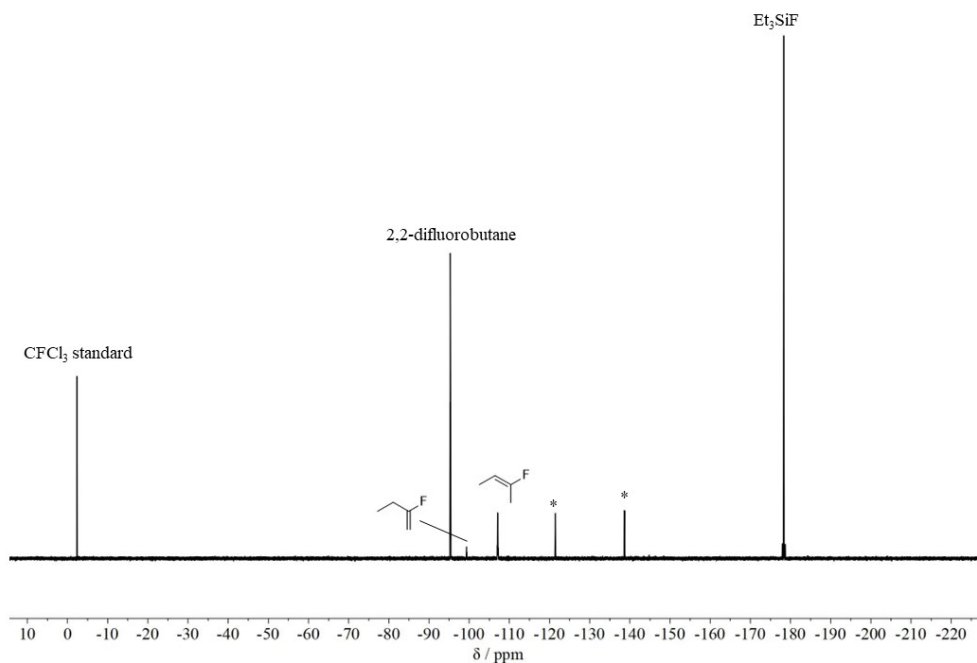

Figure S 40.:  $^{19}\text{F}$  NMR spectrum (377 MHz, methylene chloride- $\text{d}_2$ , 25  $^\circ\text{C}$ ) of the reaction between  $\text{Et}_3\text{SiH}$  and 2,2-difluorobutane in the presence of **1**. After 24 h 2,2-difluorobutane ( $\delta(^{19}\text{F}) = -93$  ppm) is mostly consumed and  $\text{Et}_3\text{SiF}$  ( $\delta(^{19}\text{F}) = -175$  ppm) is produced. Asterisk mark some unidentified impurity in the 2,2-difluorobutane batch.

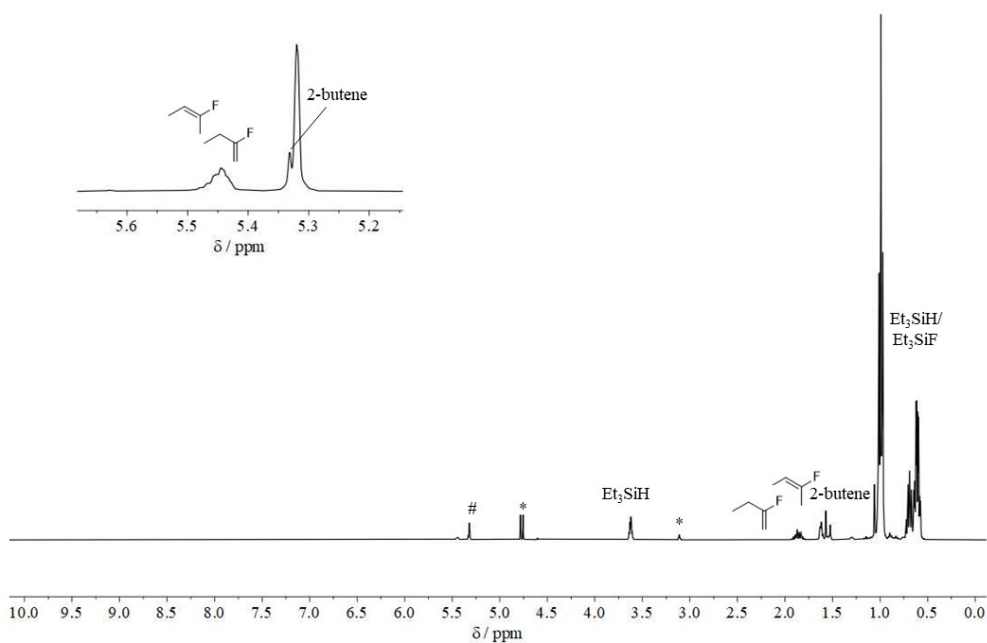

Figure S 41.:  $^1\text{H}$  NMR spectrum (400 MHz, methylene chloride- $\text{d}_2$ , 25  $^\circ\text{C}$ ) of the reaction of 2,2-difluorobutane with  $\text{Et}_3\text{SiH}$  in the presence of **1**. Asterisk mark the external capillary. The cross marks  $\text{CD}_2\text{Cl}_2$ .

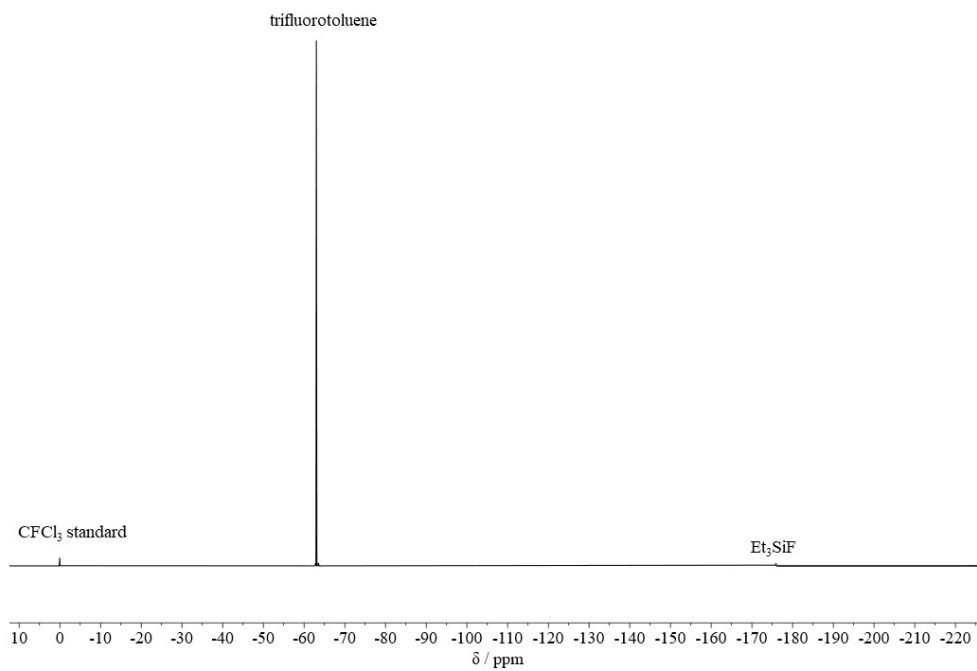

Figure S 42.:  $^{19}\text{F}$  NMR spectrum (377 MHz, methylene chloride- $d_2$ , 25 °C) of the reaction between  $\text{Et}_3\text{SiH}$  and trifluorotoluene in the presence of **1**. After 24 h trifluorotoluene ( $\delta(^{19}\text{F}) = -62$  ppm) is still present and only a small amount of  $\text{Et}_3\text{SiF}$  ( $\delta(^{19}\text{F}) = -175$  ppm) is produced.

## 6. Quantum-chemical calculations

Tab. S2: Optimized geometries of theoretically studied compounds. All xyz coordinates are given in angstroms and all SCF energies are given in Hartree at the B3LYP-D3(BJ)-TZVPP level of DFT. All structures represent minima on their respective potential energy surface.

---

| <b>Al(SO<sub>3</sub>F)<sub>3</sub></b> |            |            |            |
|----------------------------------------|------------|------------|------------|
| Energy = -2413.726072635               |            |            |            |
| Al                                     | -0.0608026 | 0.0287625  | -0.0251043 |
| O                                      | 0.1172693  | 1.4618498  | -1.3037380 |
| O                                      | 0.3275075  | -1.3641140 | 1.2553842  |
| O                                      | -1.5486551 | -0.8243278 | -0.9077580 |
| O                                      | -1.6589395 | 0.6450241  | 0.8589082  |
| O                                      | 1.1150319  | 1.3411034  | 0.7658931  |
| O                                      | 1.2946787  | -1.0990682 | -0.8157596 |
| S                                      | 1.0420902  | 2.2371104  | -0.4255962 |
| S                                      | 1.3522895  | -1.9971167 | 0.3745828  |
| S                                      | -2.5514475 | -0.1746821 | -0.0128949 |
| O                                      | -3.7007784 | 0.4143550  | -0.5734028 |
| O                                      | 0.8274142  | 3.6163994  | -0.2419512 |
| O                                      | 1.3366866  | -3.3929125 | 0.1892044  |
| F                                      | -3.0334166 | -1.3278619 | 0.9139715  |
| F                                      | 2.4338468  | 2.0767150  | -1.1045368 |
| F                                      | 2.7072250  | -1.6412362 | 1.0527977  |

---

| <b>[Al(SO<sub>3</sub>F)<sub>3</sub>]<sub>2</sub></b> |            |            |            |
|------------------------------------------------------|------------|------------|------------|
| Energy = -4820.091498804                             |            |            |            |
| F                                                    | -3.1646441 | 2.2474194  | -1.4867399 |
| S                                                    | -4.0944314 | 1.9008989  | -0.2800075 |
| F                                                    | -0.9109715 | 1.8958100  | 2.4112460  |
| O                                                    | -4.3777565 | 3.0840339  | 0.4511811  |
| O                                                    | -3.3278256 | 0.8762945  | 0.4672548  |
| O                                                    | -0.6125469 | 0.7020312  | 0.3255862  |
| F                                                    | -0.0074338 | -1.1015598 | -2.2568355 |
| S                                                    | -0.3914250 | 0.5507961  | 1.7988263  |
| O                                                    | -2.2933568 | -0.7490120 | -1.5496872 |
| O                                                    | -5.2432861 | 1.2694122  | -0.9821122 |
| O                                                    | 0.9161809  | 0.3302727  | 2.3020550  |
| Al                                                   | -2.1354370 | -0.5556413 | 0.3484874  |
| S                                                    | -1.2500348 | -1.8377555 | -1.6539613 |
| O                                                    | -7.0955635 | 2.4591479  | 2.3866214  |
| O                                                    | -1.4812018 | -0.4375191 | 2.1304063  |
| O                                                    | -0.9222421 | -2.0166853 | -0.2054936 |
| O                                                    | -7.7686248 | 1.5250911  | 0.1390598  |
| O                                                    | -7.2802228 | -0.0326368 | -2.2263246 |
| O                                                    | -1.5172508 | -2.9667919 | -2.4688848 |
| O                                                    | -9.6844468 | -0.7907292 | -2.3295128 |
| S                                                    | -7.3949408 | 1.3357587  | 1.5749330  |
| Al                                                   | -6.5723696 | 0.0691806  | -0.4642216 |
| O                                                    | -3.4813270 | -1.7487945 | 0.8385301  |
| O                                                    | -6.3591512 | 0.2445070  | 1.4304591  |
| S                                                    | -8.3623620 | -1.0209255 | -1.8703675 |
| F                                                    | -8.6200430 | 0.6013321  | 2.2144011  |
| O                                                    | -5.3837569 | -1.3619406 | -0.6323043 |
| O                                                    | -8.0950768 | -1.1878612 | -0.4065092 |
| S                                                    | -4.6037471 | -2.3873361 | 0.1008332  |

---

|   |            |            |            |
|---|------------|------------|------------|
| F | -7.8676445 | -2.3614629 | -2.5128210 |
| O | -4.2826073 | -3.5438222 | -0.6570631 |
| F | -5.5432004 | -2.7863967 | 1.2835647  |

---

**[Al(SO<sub>3</sub>F)<sub>3</sub>]<sub>3</sub>**

Energy = -7230.163046261

|    |            |            |            |
|----|------------|------------|------------|
| F  | -3.4874012 | 1.8716885  | -1.6803038 |
| S  | -3.9522339 | 1.4807501  | -0.2437490 |
| F  | -0.1781264 | 2.0894353  | 1.8784076  |
| O  | -4.5360239 | 2.6124430  | 0.3829482  |
| O  | -2.7158654 | 0.9658376  | 0.3822501  |
| O  | -0.0758996 | 0.4346246  | 0.1111807  |
| F  | -3.2115098 | -1.6795587 | -3.3462785 |
| S  | 0.1613265  | 0.5900059  | 1.5878214  |
| O  | -2.1803542 | -0.8975908 | -1.3968493 |
| O  | -4.8579333 | 0.3317192  | -0.5377146 |
| O  | 1.4511138  | 0.3337174  | 2.1193047  |
| Al | -1.6802497 | -0.6093682 | 0.3691471  |
| S  | -1.8514935 | -1.7479692 | -2.5784655 |
| O  | -7.1491928 | 2.8694907  | 1.9113632  |
| O  | -1.0216529 | -0.1687269 | 2.1270419  |
| O  | -0.8100854 | -1.2802412 | -3.4164080 |
| O  | -7.4487484 | 1.3907332  | -0.1237672 |
| O  | -6.8927492 | -0.9421999 | -1.7549758 |
| O  | -1.7585956 | -3.1738794 | -2.1877365 |
| O  | -9.3599674 | -1.3323552 | -2.1311935 |
| S  | -7.4333678 | 1.5943510  | 1.3635405  |
| Al | -6.5067752 | -0.3162680 | 0.0031440  |
| O  | -3.1905405 | -1.6065999 | 1.0611310  |
| O  | -6.5950435 | 0.4041771  | 1.7666613  |
| S  | -8.1971097 | -1.5918788 | -1.3637484 |
| F  | -8.8778698 | 1.2006037  | 1.8224381  |
| O  | -5.5979612 | -1.8986794 | 0.6222479  |
| O  | -8.1874477 | -1.3068910 | 0.1088122  |
| S  | -4.2652351 | -2.4964703 | 0.6045991  |
| F  | -7.8962382 | -3.1245538 | -1.4639651 |
| O  | -3.9809618 | -3.1988007 | -0.6429661 |
| F  | -4.3467933 | -3.5709717 | 1.7107567  |
| Al | -2.5978091 | -4.5781086 | -1.2910040 |
| O  | -1.7917503 | -4.2928738 | 0.3781977  |
| O  | -0.6120118 | -2.1736099 | 0.3330162  |
| S  | -0.6012913 | -3.5541346 | 0.8822964  |
| F  | 0.5805892  | -4.1741994 | 0.0711254  |
| O  | -0.3524051 | -3.7042114 | 2.2692950  |
| O  | -3.7862183 | -5.9443025 | -0.5920448 |
| O  | -1.3236693 | -5.7031640 | -1.9373597 |
| O  | -3.9005881 | -4.9649356 | -2.6747622 |
| O  | -0.6599109 | -7.0733557 | -0.0066135 |
| S  | -4.5963573 | -6.0156874 | -1.8575652 |
| S  | -0.6913519 | -6.9930756 | -1.4402512 |
| O  | -4.8874945 | -7.2770433 | -2.4361590 |
| O  | 0.4661190  | -7.3136896 | -2.2202190 |
| F  | -5.9646964 | -5.3581324 | -1.4655653 |
| F  | -1.8177190 | -8.0275908 | -1.8976714 |

---

**[Al(SO<sub>3</sub>F)<sub>3</sub>F]<sup>-</sup>**

Energy = -2513.783452916

|    |            |            |            |
|----|------------|------------|------------|
| Al | 0.2887438  | 0.1456634  | 0.7230048  |
| O  | -0.1298317 | 3.3033522  | 0.0899181  |
| O  | 0.6509494  | -1.5170181 | 0.2128051  |
| O  | -2.3080961 | -0.2914719 | -1.3464494 |
| O  | -1.4759118 | 0.2026733  | 0.8941075  |
| O  | 0.8192301  | 1.1736461  | -0.6201299 |
| O  | 3.0908456  | -1.5950756 | 0.1973620  |
| S  | 0.5977682  | 2.6368808  | -0.9412267 |
| S  | 1.8969174  | -2.3743227 | 0.2160562  |
| S  | -2.6518945 | -0.2054574 | 0.0343039  |
| O  | -3.8395529 | 0.4543654  | 0.4557098  |
| O  | 1.7650444  | 3.2207932  | -1.5073631 |
| O  | 1.7410955  | -3.4959004 | -0.6449630 |
| F  | -2.8143380 | -1.7094947 | 0.5233578  |
| F  | -0.4181696 | 2.4798899  | -2.1444336 |
| F  | 1.8006735  | -2.9621865 | 1.6905350  |
| F  | 0.9865266  | 0.5336629  | 2.1674054  |

---

**Ph<sub>3</sub>COSO<sub>2</sub>F (6)**

---

Energy = -2942.038312369

|   |            |            |            |
|---|------------|------------|------------|
| C | -0.2937518 | -0.0846147 | -0.3630600 |
| C | 0.1645048  | 1.3803427  | -0.2451208 |
| C | -1.0648593 | -0.6408265 | 0.8356856  |
| C | 0.9764791  | -0.8709159 | -0.7424317 |
| C | 1.6844017  | -1.7132899 | 0.1271987  |
| C | 0.4507123  | 3.6765792  | -1.0244978 |
| C | 1.5879447  | 2.9648415  | 0.9720486  |
| F | 1.2685573  | -1.9591653 | 1.3687777  |
| F | -0.8683340 | 2.2149570  | -2.2423909 |
| F | -2.4511042 | -3.8869485 | 1.7925572  |
| C | 2.8643122  | -2.3495587 | -0.2624375 |
| F | 2.3928987  | 3.2192393  | 1.9971421  |
| F | 1.3372272  | 0.7663286  | 1.7136489  |
| C | 1.5488824  | -0.6514085 | -2.0080866 |
| F | 3.2183409  | -1.0553992 | -3.6246561 |
| F | 4.5081186  | -2.7386254 | -1.9067350 |
| C | 2.7217073  | -1.2846722 | -2.4140303 |
| C | 1.2988305  | 3.9633853  | 0.0406698  |
| F | 1.8196925  | 5.1740341  | 0.1757728  |
| C | 3.3875231  | -2.1378112 | -1.5354224 |
| F | 0.1697571  | 4.6166958  | -1.9202136 |
| F | 3.4935084  | -3.1527963 | 0.5887958  |
| C | -1.6084239 | 0.1339150  | 1.8693955  |
| C | -1.4029366 | -2.0050126 | 0.8315870  |
| C | -2.1708321 | -2.5893185 | 1.8319514  |
| F | -3.4144924 | -2.3343393 | 3.8183939  |
| F | 0.9982712  | 0.2034758  | -2.8680492 |
| F | -2.8613134 | 0.3326044  | 3.8575168  |
| C | -2.3780302 | -0.4349924 | 2.8870457  |
| C | 1.0350267  | 1.7006048  | 0.8076715  |
| F | -0.9770748 | -2.7938881 | -0.1537378 |
| C | -2.6720329 | -1.7955935 | 2.8646992  |
| C | -0.0931409 | 2.3966689  | -1.1722489 |
| F | -1.4269826 | 1.4494195  | 1.9406961  |
| O | -1.1605806 | -0.2836362 | -1.5431235 |
| F | -3.3845878 | -1.1472910 | -1.0733499 |
| S | -2.6901130 | 0.2024878  | -1.6066438 |



|   |            |           |            |
|---|------------|-----------|------------|
| O | -2.9763791 | 1.2133662 | -0.6167805 |
| O | -3.0317272 | 0.3011582 | -2.9982380 |

---

**C<sub>19</sub>H<sub>10</sub>F<sub>6</sub>O (7)**

---

Energy = -2194.358624205

|   |            |            |            |
|---|------------|------------|------------|
| C | 0.1149056  | -0.0919475 | -0.0594644 |
| C | 0.0812146  | 1.3731531  | -0.2527282 |
| C | -1.0283690 | -0.6280028 | 0.7089551  |
| C | 1.1288421  | -0.8907942 | -0.5530378 |
| C | 1.3738788  | -2.2458730 | -0.0681878 |
| C | -1.1724778 | 3.4070359  | -0.7700104 |
| C | 1.1135150  | 3.5719876  | 0.0067984  |
| F | 0.6401789  | -2.7107050 | 0.9410333  |
| F | -2.1628618 | 1.3047957  | -1.0166752 |
| F | -3.6722931 | -3.1305690 | 0.4044597  |
| C | 2.3707808  | -3.0299946 | -0.5441098 |
| F | 2.1608731  | 4.3164544  | 0.3443874  |
| F | 2.3098482  | 1.6284032  | 0.5086162  |
| C | 2.0436048  | -0.4481452 | -1.6013305 |
| F | 3.8109467  | -0.7996417 | -3.0799702 |
| O | 4.1889697  | -3.2964215 | -2.0371445 |
| C | 3.0353970  | -1.2295531 | -2.0921731 |
| C | -0.0667850 | 4.1851543  | -0.4223140 |
| F | -0.1329993 | 5.5048771  | -0.5062513 |
| C | 3.2899410  | -2.5904810 | -1.6020217 |
| F | -2.2890178 | 3.9905415  | -1.1913124 |
| F | 2.5838883  | -4.2379536 | -0.0366670 |
| C | -1.4460098 | -0.0171630 | 1.9027149  |
| C | -1.8085394 | -1.6903949 | 0.2233783  |
| C | -2.9459864 | -2.1306200 | 0.8920669  |
| F | -4.4068339 | -1.9261541 | 2.7298455  |
| F | 1.8521752  | 0.7448248  | -2.1609350 |
| F | -2.9315474 | 0.1294082  | 3.7344358  |
| C | -2.5738088 | -0.4521739 | 2.5949796  |
| C | 1.1770518  | 2.1846667  | 0.0843940  |
| F | -1.4739550 | -2.2938039 | -0.9152785 |
| C | -3.3297939 | -1.5082016 | 2.0830351  |
| C | -1.0931167 | 2.0197764  | -0.6712414 |
| F | -0.7416165 | 0.9875148  | 2.4217530  |

---

## 7. Literature

- [1] K. F. Hoffmann, D. Battke, P. Golz, S. M. Rupf, M. Malischewski, S. Riedel, *Angew. Chem. Int. Ed.* **2022**, *61*, e202203777.
- [2] R. Ahlrichs, M. Bär, M. Häser, H. Horn, C. Kölmel, *Chem. Phys. Lett.* **1989**, *162*, 165.
- [3] a) R. A. F. Weigend, *Phys. Chem. Chem. Phys.* **2005**, *7*, 3297; b) A. Schäfer, H. Horn, R. Ahlrichs, *J. Chem. Phys.* **1992**, *97*, 2571; c) A. D. Becke, *Phys. Rev. A* **1988**, *38*, 3098; d) S. H. Vosko, L. Wilk, M. Nusair, *Can. J. Phys.* **1980**, *58*, 1200; e) C. Lee, W. Yang, R. G. Parr, *Phys. Rev. B* **1988**, *37*, 785; f) J. P. Perdew, *Phys. Rev. B* **1986**, *33*, 8822.
- [4] F. Neese, *Wiley Interdiscip. Rev. Comp. Mol. Sci.* **2018**, *8*, e1327.
- [5] a) G. S. A. Klamt, *J. Chem. Soc. Perkin Trans.* **1993**, *2*, 799; b) M. C. V. Barone, *J. Phys. Chem. A* **1998**, *102*, 1995.
- [6] S. Singh, R. D. Verma, *Polyhedron* **1983**, *2*, 1209.
- [7] K. F. Hoffmann, A. Wiesner, S. S. Steinhauer, S. Riedel, *Chem. Eur. J.* **2022**, *28*, e202201958.
- [8] a) J. K. Murthy, U. Gross, S. Rüdiger, V. V. Rao, V. V. Kumar, A. Wander, C. L. Bailey, M. N. Harrison, E. Kemnitz, *J. Phys. Chem. B* **2006**, *110*, 8314; b) S. M. Coman, P. Patil, S. Wuttke, E. Kemnitz, *Chem. Commun.* **2009**, *4*, 460; c) M. H. G. Precht, M. Teltewskoi, A. Dimitrov, E. Kemnitz, T. Braun, *Chem. Eur. J.* **2011**, *17*, 14385.
